# Supplementary material for: Brain Cell Type-Specific Nuclear Proteomics Is Imperative to Resolve Neurodegenerative Disease Mechanisms
Source: Front Neurosci. 2022 Jun 16;16:902146. doi: 10.3389/fnins.2022.902146 (PMC9243337; doi:10.3389/fnins.2022.902146)
Supplement: Supplementary file 1 [file Table_1.XLSX]

## Sheet: MAGMA Disease Gene Lists
AD MAGMA (Kunkle 1,822 genes)			PD MAGMA (Nalls et al 621 genes)				ALS MAGMA (Al-Chalabi 1,484 genes)
Gene Symbol	MAGMA -log10 p value		Gene Symbol	MAGMA -log10 p value			Gene Symbol	MAGMA -log10 p value
ABCA1	1.58534		SNCA	71.3497			MOB3B	13.6703
ACAA1	1.44686		WNT3	41.9208			C9orf72	12.5614
ACADL	1.67658		TMEM175	39.3565			IFNK	9.30103
ACADM	1.33187		NSF	38.5513			TNIP1	9.07982
ASIC2	2.02871		DGKQ	37.3565			GPX3	7.4947
ACP1	2.54034		ASH1L	36.5638			ACSL5	6.66726
ACP2	5.46478		KANSL1	35.098			ATXN3	6.3815
ACTA1	1.47541		MAPT	34.6364			G2E3	6.15694
ACTB	2.99448		STH	34.6364			ZDHHC6	5.635
ADA	1.48684		GAK	33.4711			SCFD1	5.25931
ADAM10	3.81048		SLC26A1	31.6925			MYO19	5.24087
ADAR	1.73323		IDUA	30.5171			NR1I3	5.0769
ADCY5	3.03252		MMRN1	25.5361			ZNHIT3	5.00839
ADH4	1.34098		KRTCAP2	22.2147			PIGW	4.95206
ADRA2A	1.78026		TRIM46	22.2147			TOMM40L	4.91304
AP2A2	3.67134		CCSER1	20.9666			GGNBP2	4.89002
AP1G1	2.13352		LRRK2	20.4377			ANXA6	4.83165
ACAN	1.88147		CRHR1	20.0731			ARHGEF25	4.58033
AGER	2.77773		GON4L	19.821			SLC26A10	4.53757
AHCY	2.40835		SYT11	19.821			UNC13A	4.50106
AIF1	3.11879		MCCC1	18.5258			ERGIC1	4.48927
ALDOA	2.01491		UBQLN4	17.4101			FLG	4.44032
AMHR2	1.41448		LAMTOR2	17.4101			TRIP11	4.43842
BIN1	17.4518		EFNA1	16.1805			TBK1	4.42562
AMY2B	1.44487		SLC50A1	16.1805			B4GALNT1	4.25212
ANGPT2	1.36525		DPM3	16.1805			FNBP1	4.04642
ANK1	1.64689		RAB29	16.1791			ZFYVE28	4.01465
ANXA11	1.52094		IGF2BP3	16.0395			DOCK3	4.01438
APBB1	1.44849		IGSF9B	15.618			ZNF184	3.94401
APOA1	1.44471		TMEM229B	15.2041			DENND6B	3.93506
APOA4	2.58173		PLEKHH1	15.2041			DEGS1	3.92205
APOC3	1.8475		STK39	15.1688			CLCN3	3.86809
APP	1.69519		NUCKS1	15.1656			EFL1	3.85443
AQP4	1.38129		BST1	14.9508			SPATA2	3.8331
ARL4D	1.30948		CPLX1	14.5884			PGS1	3.79542
ARF5	2.94896		C2	13.8794			TECTB	3.79253
ARHGAP1	3.84542		CFB	13.8794			TLNRD1	3.78463
ARHGDIG	1.72965		MALSU1	13.8416			COG3	3.77981
ARL2	2.70382		RAB25	13.4802			RNF114	3.75818
ART3	1.58943		MEX3A	13.4802			HRNR	3.72941
RERE	2.12589		WNT9B	13.4353			ZNF391	3.69407
ATP1A3	1.63774		SPPL2C	13.3556			ZBED2	3.68169
AZGP1	1.66702		SCARB2	13.2733			UBAP2	3.65488
BAG1	1.55379		FGFRL1	13.2684			MR1	3.64884
ADGRB1	1.52932		SSR2	13.2628			APOA2	3.57059
BBS2	1.37446		LAMP3	13.2013			TTLL4	3.56203
BDNF	1.54656		ZBTB7B	12.7905			SOCS3	3.55447
BFSP1	2.35965		DCST2	12.7905			CYP27A1	3.51187
BHMT	1.3608		GPNMB	12.7496			OS9	3.50403
CXCR5	2.96569		SH3GL2	12.5346			PIP4K2C	3.4963
POLR3D	2.01646		LMNA	12.4789			JADE2	3.48455
FOXL2	1.30269		NUPL2	12.4559			SAR1B	3.48329
BPI	1.9426		SLC41A1	12.1965			KIAA0930	3.43753
ZFP36L2	2.04982		PMVK	12.1158			PCP4L1	3.43516
C1QBP	2.05689		PBXIP1	12.1158			OR10G9	3.43459
SERPING1	1.68413		MAP3K14	12.1085			OR10G4	3.4337
C1S	4.37594		FAM47E	12.0711			RHOT2	3.43147
C2	1.78136		CCDC62	11.6289			SNAI1	3.41209
C4B	1.79981		HIP1R	11.6289			DLGAP4	3.40969
C4BPA	1.3318		HLA-DRB1	11.5214			SAXO2	3.40165
VPS51	2.24365		KLHL7	11.1226			BTBD1	3.39911
MRPL49	2.23685		R3HDM1	11.0395			RHBDL1	3.38779
ZNHIT2	2.28288		TAP1	11.0088			WDR90	3.36663
MPPED1	1.47615		TMEM163	10.8928			OR10G7	3.36342
CALB2	1.87238		CD38	10.8386			C12orf56	3.36188
CALML3	1.73793		RIT2	10.7986			OR10G8	3.36106
CAMK4	2.21248		SPPL2B	10.7328			RNF133	3.35639
CANX	3.19144		DCST1	10.5544			MSI2	3.35249
CAPZB	1.69071		VKORC1	10.3575			PLXNB2	3.35004
CASP9	2.22645		PCGF3	10.2154			EPDR1	3.34683
CAT	1.40374		TIAL1	10.067			STUB1	3.33943
RUNX2	1.45002		LSM7	10.054			MYH10	3.3378
CCBL1	1.37598		PRSS53	10.0329			DYNLL2	3.33234
KRIT1	1.33125		ZNF668	9.9393			JMJD8	3.33105
CCNT1	1.78614		STX4	9.91364			NDST2	3.31206
CD4	1.31646		ZNF646	9.81531			TSPAN31	3.30147
CD5L	1.76361		SLC45A3	9.76955			NKX2-5	3.27317
CD8B	1.6937		FDFT1	9.72125			AGAP2	3.26042
CD14	1.42032		BCKDK	9.68403			SLC9A8	3.25347
MS4A3	11.4931		PRSS8	9.53165			MESD	3.24676
CD27	1.78784		LINGO3	9.38828			RAB18	3.23104
CD33	6.51436		PRSS36	9.37986			ATXN2	3.22981
SIGLEC6	1.30448		CTSB	9.37366			MED26	3.22037
SCARB1	2.90372		KAT8	9.33442			POLR2J2	3.21115
CD38	3.40241		SEC23IP	9.26761			PLCD4	3.20986
ENTPD3	1.99675		NUP54	9.26281			RNF148	3.20863
CD63	1.49197		HSD3B7	9.20482			BCS1L	3.19775
CD79A	1.36925		TNFSF12	9.12843			FBXO28	3.19668
CDK1	1.69659		TNFSF12-TNFSF13	9.12033			RNF25	3.19607
CDK6	2.00331		GCH1	9.10237			ZNF142	3.19312
CEL	2.4804		WDHD1	9.00833			MCRIP2	3.1878
CENPC	2.68388		STX1B	8.97469			CAST	3.18639
CENPE	1.39353		HLA-DOB	8.94692			BLVRA	3.17735
CHD4	2.43095		TAP2	8.94692			CISH	3.17286
CHRM3	1.39789		PSMB8	8.94692			DTX3	3.16395
CHRNA2	6.62184		HLA-DMB	8.83863			CNOT9	3.15466
CHRNB2	2.02169		TUBG1	8.81816			WDR24	3.15426
CHRNE	3.54301		SETD1A	8.77469			TSSK1B	3.15082
CKB	2.4879		TNXB	8.75945			HEMK1	3.14767
CLCN6	1.46405		FGF11	8.73755			STK36	3.14676
CLU	14.9751		TMEM102	8.72816			USP37	3.14485
CLIC1	1.36575		HSD17B1	8.66154			ACADS	3.14086
PLK3	2.44377		CHRNB1	8.64589			COA1	3.13601
CNN2	9.89005		ATF6B	8.62709			IDUA	3.13088
COL7A1	1.98384		NAGLU	8.58503			USP3	3.12836
COL9A1	1.555		CAMK2D	8.5817			SEC24C	3.11756
COL16A1	2.27108		ITPKB	8.52871			IGFBP5	3.11458
SLC31A1	1.72054		UBAP2	8.49349			CAMK2G	3.09866
COX8A	1.69332		LZTS3	8.47625			XPOT	3.08303
CR1	14.8812		SKIV2L	8.44009			PPID	3.08123
CR1L	11.8715		SORBS3	8.44009			KCNH4	3.07249
CR2	8.97188		MAP3K19	8.4318			STK17A	3.0675
ATF6B	3.12359		NELFE	8.40561			C12orf66	3.06016
CRH	1.87189		POM121L2	8.3536			FGFRL1	3.05907
CRHR1	1.56511		DLG2	8.28483			SH3BP2	3.04905
CRIP1	2.37903		PRSS3	8.27984			WDR64	3.0044
CRIP2	1.98101		SYNE1	8.266			FDFT1	3.00192
CRX	1.48958		STBD1	8.24642			METTL21C	2.99961
CRY2	4.56419		MYO15A	8.07058			DERL2	2.9974
CSNK2B	3.01848		RGS10	7.99568			PPP6R2	2.99521
CSTF1	5.54606		TUBG2	7.83268			TMEM170B	2.99119
CTF1	1.54557		SIPA1L2	7.82391			WNT7A	2.98919
CTRB1	1.57845		CCR10	7.82102			SPDYE2B	2.9758
CYB561	4.30803		CNTNAP1	7.82102			PDLIM2	2.97224
CYP3A4	1.55542		ARAP3	7.82102			GALNT3	2.96928
CYP21A2	2.79915		UBOX5	7.81531			DSCAML1	2.96043
CYP24A1	1.35933		FASTKD5	7.81531			UNC119B	2.95754
CYP27A1	1.39554		RAB3GAP1	7.7986			CELF4	2.95711
DAB1	2.24449		SOCS4	7.78516			AGAP5	2.94573
CD55	1.4451		DDRGK1	7.767			IGFBP2	2.94298
DAPK1	1.45294		ORAI3	7.76195			CD96	2.94249
ACE	4.10857		METTL21C	7.75449			MRPL57	2.94199
DDB2	4.83553		UBXN4	7.74958			RPS6KC1	2.91833
DEFA1	1.58253		CCDC158	7.5157			C3orf18	2.91368
DHODH	1.42648		CNTN1	7.51428			SBF1	2.91208
DLST	3.86528		PYGO2	7.51004			FLG2	2.9102
DLX2	1.79469		HLA-DQA1	7.49894			MAPKAPK3	2.90798
DMRT1	1.61119		UBE2R2	7.45842			MEF2C	2.88582
DNAH5	2.52759		FBXL19	7.383			DHRS11	2.88499
DNAH8	1.54635		SLC2A13	7.38091			STAT6	2.87788
DNASE1	1.74194		TNF	7.31605			PTCHD3	2.87543
DNM2	1.3345		BRD2	7.23732			DNAJC5	2.86851
DNTT	2.59042		FKBPL	7.23359			OSTN	2.84897
DPP4	2.33794		C1QL1	7.23284			SOD3	2.84851
ARID3A	2.09253		AGAP1	7.21042			CLMP	2.84637
DTNB	2.19776		COASY	7.18842			CDK4	2.84494
HBEGF	7.25277		ZBTB4	7.17328			NEK1	2.82968
ECH1	1.96835		DCUN1D1	7.15864			PRSS1	2.82731
EEF1D	1.54468		HLA-DMA	7.13847			FBF1	2.81211
EIF2D	1.36386		LCT	7.09528			PRSS3	2.8061
EGF	1.34659		NEU1	7.05799			MLEC	2.80319
EGR1	2.04664		SLC44A4	7.05799			NME8	2.80261
EIF4EBP2	1.4689		CAB39L	7.04335			IRS2	2.79577
ELF5	1.65427		DARS	7.04144			ANGEL2	2.79442
MARK2	2.11055		ACMSD	7.02826			UBE2R2	2.79361
ADGRE1	2.54494		LLGL1	6.93554			VIL1	2.75582
EN2	1.41117		KCNN3	6.92082			ZSWIM8	2.75156
ENO3	1.56162		MCM6	6.91721			SH2B3	2.7479
EP300	1.84375		GOSR2	6.87615			KIAA0513	2.71995
EPHA1	8.12257		CTF1	6.83863			PPP2R2D	2.71849
EPHA5	2.69478		RPRML	6.81816			SCYL2	2.7177
EPHX2	4.08581		FAM134C	6.80134			NEIL2	2.71665
CLN8	1.8262		ITGA8	6.79588			GATA4	2.70941
ETF1	2.06067		PM20D1	6.79317			MCC	2.7006
ETFB	1.33893		ABCB9	6.74232			RORA	2.68447
ETFDH	1.59979		PLEKHH3	6.73049			LOXL2	2.68083
EXTL3	1.60335		CC2D2A	6.7122			DEPDC4	2.67811
F2	1.6109		NDUFAF2	6.7122			FSTL4	2.67097
F13B	2.515		RBMS3	6.67778			POU3F3	2.66724
PTK2B	9.51694		HSPA1B	6.65365			C8orf58	2.64641
FAU	2.29414		C6orf48	6.65365			ANKRD52	2.63776
EFEMP1	1.30956		FLII	6.64397			KIF5A	2.63558
MS4A2	15.7122		FXR2	6.63639			IL23A	2.62786
FCGR1B	1.42354		LTK	6.62342			STAT2	2.6256
FCGR2A	1.7252		RPAP1	6.62342			NKX6-3	2.62543
FCGR3A	1.54259		TPM1	6.57349			SLC39A5	2.62113
FCGR3B	1.40422		EHMT2	6.56864			PRM3	2.60831
FKTN	3.227		MTMR7	6.55129			TAS2R60	2.60714
FGF7	1.92897		ATP6V0A1	6.53313			ATF6	2.60309
FOXO3	2.45875		NEIL2	6.50307			PAN2	2.60258
FLT3LG	1.43407		SYT17	6.42829			SFRP4	2.59645
FOLH1	3.04512		SETD8	6.39577			WDR33	2.5951
FPR1	1.49636		RILPL2	6.39577			TNP2	2.58444
G6PC	3.16721		MIEF2	6.34775			CNPY2	2.57925
GABPB1	2.44196		ITPKA	6.30715			BCAR3	2.57838
GAPDH	1.6301		DXO	6.29499			BCL7A	2.57569
GAS8	1.44165		STK19	6.29499			FBXO9	2.57438
GBX2	1.57661		C4A	6.29499			BNIP1	2.57391
BLOC1S1	1.3276		SHROOM3	6.27409			SLC26A1	2.57146
GGT7	1.63354		POLR2A	6.25885			NVL	2.56965
GJA5	1.44273		ZRANB3	6.23284			FOXN2	2.56703
GNRHR	1.54729		SENP3	6.22621			DMXL2	2.56617
GOLGB1	1.5482		TPP2	6.22257			MARK3	2.56486
GP1BA	2.35689		ERCC8	6.20204			KHDRBS3	2.56377
GPR27	1.74139		ZNF629	6.19723			APOF	2.55503
MLNR	2.25723		FAM167A	6.1945			COQ10A	2.5545
GPX4	1.61416		GRN	6.13906			GDF9	2.55447
GRN	1.43405		PDLIM2	6.12263			SHROOM1	2.54726
GTF2F2	1.79239		NLRC4	6.11182			CS	2.54037
GYPA	1.30806		ANKLE2	6.1107			C15orf40	2.53696
H1F0	2.38387		GOLGA3	6.1107			SKA3	2.52922
H2AZ1	1.62801		C17orf74	6.10073			CKB	2.52878
HARS	1.94892		BCL7C	6.06956			YOD1	2.52198
HBA1	1.74897		SPATA19	6.05849			TRMT61A	2.52136
HBA2	1.73086		FAM171A2	6.05159			DHX33	2.52087
HBM	1.97564		ITGA2B	6.05159			ZDHHC7	2.51139
HBQ1	1.85736		ALKBH5	6.04818			CTNNBL1	2.49431
HBZ	1.87847		CCNT2	6.03858			PRM2	2.48853
HCRTR1	2.14197		MBNL2	5.97881			AFF4	2.48706
CFHR2	1.62771		BIRC6	5.97469			UPK3BL1	2.48606
HIC1	1.43414		INPP5F	5.97062			PRM1	2.48333
HLA-B	1.72077		KCNQ5	5.95861			NA	2.48128
HLA-DOB	1.83744		CCAR2	5.94692			CFAP53	2.47621
HLA-DQA1	4.44416		YIPF4	5.9431			NOX3	2.47269
HLA-DQB1	4.84257		BIN3	5.9393			NFASC	2.46989
HLA-DRA	6.43098		CLEC19A	5.91364			GPR18	2.46118
HLA-DRB1	7.54307		HSPA6	5.84771			MIS12	2.45122
HLA-DRB5	5.76896		DDX39B	5.81816			OR8H2	2.44927
HMGCL	1.43911		ATP6V1G2	5.81816			FBXL16	2.44914
HNMT	1.64247		NFKBIL1	5.81816			PEX2	2.44552
HNRNPA1	1.46651		LTA	5.81816			SFT2D3	2.44441
HNRNPA2B1	3.45764		PLCD3	5.81248			RAPGEF5	2.44273
HNRNPL	1.70507		ACBD4	5.81248			NCOA6	2.44168
HOXD3	2.1622		HEXIM1	5.81248			VASH2	2.44096
HOXD4	2.37394		TNFSF13	5.80967			FCER1G	2.43856
HOXD8	2.1476		FCGR2A	5.80688			FUT11	2.43634
HOXD9	1.78819		PITPNM2	5.79588			SMIM7	2.43557
HPD	1.50587		PKNOX1	5.75945			SATB1	2.4314
HPX	2.02267		UTRN	5.75203			NDEL1	2.42606
AGFG1	2.21165		ELOVL7	5.73283			SLC29A2	2.42575
AGFG2	1.41281		HEXIM2	5.72125			SERPING1	2.42091
HSF1	1.58865		SMIM15	5.70774			OR6T1	2.41918
HSPA2	1.94531		SHBG	5.67985			TECR	2.41668
HSPA6	1.70968		VAMP4	5.63827			ATG4B	2.41596
ICA1	1.51542		EGR3	5.62342			RASGEF1C	2.4118
ICT1	4.40562		GPATCH8	5.61439			FNIP2	2.41159
IDH2	1.34669		ADAM15	5.60206			METTL26	2.40967
IFNA1	1.98877		EFNA4	5.60206			IL1B	2.40838
IFNA2	2.373		EFNA3	5.60206			TTC25	2.40811
IFNA5	1.50794		C8orf58	5.57512			ERICH6B	2.39363
IFNA6	2.2302		RIMBP2	5.54821			UQCRQ	2.39321
IFNA8	3.48986		DRG2	5.5376			QSOX1	2.39307
IFNA13	1.31217		PITX3	5.52578			MRM1	2.38903
IFNA14	2.46702		RAP2A	5.51999			OR5B12	2.38826
IFNA16	1.33147		ITPA	5.5157			ATF1	2.38768
IFNA17	1.37672		MLX	5.50864			HAT1	2.38499
IFNGR2	1.32285		PSMC3IP	5.50864			TKTL2	2.37848
IK	1.5492		HK1	5.47756			ERICH1	2.37592
IL2RA	1.59035		GBF1	5.47366			USP20	2.37494
IL10	1.61425		FAM151B	5.46597			CHCHD1	2.37465
IL15	3.51475		SLC35G6	5.45593			B4GAT1	2.37274
INHBB	2.43814		TXNDC15	5.44129			PROM2	2.3495
CXCL10	1.31023		GID4	5.43415			NABP2	2.3471
INSRR	1.39549		FBRSL1	5.43297			LIMS2	2.34545
ITGA2	1.37172		CATSPER3	5.41229			ETFDH	2.34538
ITGA2B	2.00989		MAPK1IP1L	5.383			MBD1	2.34436
ITGAM	1.80699		SCAMP5	5.38091			SREK1	2.34257
ITGB3	2.42275		DCDC2	5.37469			CNP	2.34151
KCNA2	1.67381		BLNK	5.3536			PLOD2	2.34127
KCNJ12	1.50159		NMD3	5.34872			OR8I2	2.34064
KIR2DL1	1.44692		DNAH11	5.32606			MCM3	2.34002
KIR2DL3	1.45324		NDUFV3	5.32331			NUP50	2.33896
KIF11	1.33242		C18orf63	5.32239			USP42	2.32799
KPNB1	3.6591		SOX15	5.30715			SERPINB6	2.32525
KPNA2	1.65451		DOT1L	5.24872			ATP10D	2.32196
KRTAP5-9	1.78917		CTIF	5.22475			THOP1	2.31911
KRT9	2.11639		ATG14	5.21968			ATP8A2	2.31709
KRT14	2.45521		MPDU1	5.21824			LEAP2	2.31569
KRT16	2.55318		MCF2L2	5.20971			PSAPL1	2.31315
KRT17	2.20701		PPM1L	5.20901			EFHD1	2.31129
KRT33A	1.37157		SPTSSB	5.19111			DUSP12	2.30849
LAG3	1.53524		FBXO34	5.18842			PIGU	2.30674
LAMA4	1.43176		ATP11B	5.16749			ACTR6	2.30616
LAMB3	1.34865		SATB1	5.16368			CDC16	2.29876
LASP1	1.86044		BORCS7	5.14448			MRPL38	2.2985
LBP	1.33644		AS3MT	5.14448			GDI2	2.29846
LEPR	1.54163		FAM184A	5.13906			BIN3	2.29794
LGALS4	1.46974		ELOVL3	5.11862			SLC35E1	2.29673
LIG3	1.39329		SREBF1	5.10958			PKM	2.29486
LIPC	2.12205		ZFYVE16	5.06399			CCDC182	2.29456
LPO	1.30831		PSMB9	5.06298			GSK3B	2.29314
LRCH4	1.60314		PCBD2	5.04866			CDC14B	2.29251
LRP4	2.54496		MAP4K4	5.02503			SDCCAG8	2.28843
LTC4S	3.81936		SOCS6	5.02228			TPP2	2.28035
MAP6	1.34361		AKAP12	5.00966			NDUFS4	2.27836
MAPT	1.69248		CCKBR	5.00261			CFAP161	2.27762
MARK1	1.43843		ZNF518A	5			NPEPPS	2.27738
MARK3	2.35422		FAM49B	4.99568			WHAMM	2.27729
MAT1A	2.79019		ARRDC4	4.99568			CCAR2	2.27449
MATK	1.40729		PRDM2	4.9914			DNAJB1	2.27204
MATN1	2.26325		DDX46	4.98716			EFHB	2.26323
MBNL1	1.76324		JADE2	4.98297			OR8K3	2.26242
MCC	1.3345		SPAST	4.98297			FAM117B	2.26239
CHST6	1.5997		LRRC16A	4.97881			OR5T2	2.25802
MCM7	2.51466		VPS9D1	4.97062			SOWAHA	2.25666
CD46	2.31715		ZNF276	4.97062			PTBP3	2.25445
MEF2C	2.41685		RAI1	4.96257			UBAC2	2.24918
MFAP4	1.31448		CDC25A	4.96257			RNF130	2.2464
MGMT	1.54535		NINL	4.95468			THBS2	2.24487
CIITA	2.59929		TOX3	4.95468			PIN1	2.24269
MICB	1.84518		NLGN2	4.94692			MAPK8	2.24002
CXCL9	1.90462		SPEM1	4.94692			OR4D5	2.2384
MIP	1.44451		CLCN3	4.9431			GPR55	2.23719
MIPEP	2.46564		CACNA1B	4.92812			OR5J2	2.22556
MKI67	1.47241		SEMA7A	4.92445			SORCS1	2.22497
TRPM1	1.81841		SLC17A4	4.92082			LOC728392	2.22427
MMP2	1.99641		MAEA	4.91364			ZNF2	2.22406
MMP19	1.81225		UBL7	4.8962			FOXI3	2.22372
MPO	1.65421		TNS1	4.89279			OR5T3	2.21978
MYO1B	2.02531		C5orf24	4.88606			SPATA19	2.21888
MSH5	1.58889		TOM1L2	4.86646			PLA2G12A	2.21192
MSRA	1.8246		LDB1	4.86328			ZBTB42	2.21189
MT1E	1.52686		CAMLG	4.86328			OR8H3	2.21033
MTAP	1.46218		ARID3B	4.85699			MIR205HG	2.2094
MTHFR	1.42808		SRD5A2	4.83863			OR8J3	2.20926
MUC6	2.10048		ANTXR2	4.83268			GGT7	2.20463
TRIM37	2.91872		L3MBTL4	4.83268			THRSP	2.20454
MYBPC3	11.6759		SHANK2	4.82391			CHRFAM7A	2.19869
MYCL	5.10568		CDK10	4.82102			KCNIP3	2.19743
MYD88	1.53882		SPATA2L	4.82102			DAOA	2.1973
MYL1	1.99012		SLC44A1	4.79588			PARP6	2.19583
MYO7A	1.95707		SEC24A	4.78781			SOX11	2.19456
MYOC	1.31976		PPM1A	4.78781			OR5AS1	2.19376
MYOD1	1.9007		NOLC1	4.767			OR8K5	2.19246
NDUFA2	1.50973		ROBO2	4.76447			BRMS1	2.19236
NDUFAB1	1.41537		NDC1	4.76447			PRKAG3	2.18997
NDUFB9	1.68643		VPS37A	4.75696			WWC2	2.18975
NDUFS3	8.77487		HP11026	4.74715			PIP5KL1	2.18495
NDUFS4	2.0657		FAM200B	4.74232			C1orf162	2.18319
NDUFV2	1.38578		CYP1A1	4.73993			PGAP6	2.17404
NEK2	1.60882		CYP1A2	4.73993			OR10W1	2.17399
NFE2	1.89829		CNTNAP4	4.7167			OR8H1	2.17371
NFYA	8.50075		PLXNA4	4.6925			SLC25A12	2.16826
NFYB	1.69605		PMM2	4.68403			PSMD9	2.16797
NFYC	1.89808		CARHSP1	4.68403			DPM2	2.15798
NODAL	2.20832		SAR1B	4.66959			MROH9	2.1571
NOP2	2.29474		MBD5	4.66756			NA	2.15649
NOTCH4	2.4162		B3GALNT1	4.66555			PCDH10	2.15583
NOV	1.44998		LTB	4.66354			RANGRF	2.15468
NSF	1.75036		LST1	4.66354			UHRF1BP1L	2.15432
NUP88	2.71124		NCR3	4.66354			OR5T1	2.14895
NVL	2.62498		AIF1	4.66354			BNIP3	2.14766
OAS1	2.91034		CLK3	4.65561			WFIKKN1	2.14431
OAS2	3.40827		SPIRE2	4.64975			FAM102A	2.14243
OAS3	3.16211		TCF25	4.64975			KSR1	2.13862
P2RY1	1.50436		MEMO1	4.63078			PKIB	2.13336
P2RY11	1.93152		SLC30A6	4.63078			VRK1	2.13239
PAFAH1B2	1.95331		DCAF12	4.62893			PIP5K1B	2.13237
SERPINE1	1.77565		GGCT	4.61979			CREBRF	2.12787
PAX4	3.19814		B3GNT5	4.61798			C10orf55	2.12707
PBX2	2.60005		FBXL5	4.61618			ANKRD29	2.12663
PCNA	1.46667		C9orf135	4.61439			GRAMD2A	2.12642
PCSK5	1.85066		LCORL	4.61083			PLAU	2.12515
PDE4D	1.95234		RNF40	4.5986			HMX1	2.125
ENPP1	1.30814		CBS	4.5817			SOCS1	2.11883
ENPP2	1.30728		FSD1L	4.57349			TM6SF1	2.11793
PFDN1	5.32877		CCNJ	4.56225			CCDC127	2.11732
PFDN5	1.35227		PUM1	4.55284			SEC23B	2.11599
PFKFB4	1.93472		C10orf90	4.55284			ZFC3H1	2.11412
VIT	1.33671		DPY30	4.5391			ADD1	2.11207
PFN1	1.67514		MPHOSPH9	4.52433			MAP1LC3A	2.11139
PGF	2.73886		PGS1	4.5157			CAPN12	2.11072
PGGT1B	2.93607		DNAH17	4.5157			SMN2	2.10807
ABCB1	1.94773		CC2D2B	4.49349			FAM160B1	2.10347
PIK3CB	1.76843		SAT2	4.49214			EPHB2	2.10213
PIP4K2A	2.11438		ANKRD2	4.4908			OR51F2	2.10055
PITPNA	1.73187		HOGA1	4.4908			FAM228A	2.09728
PLAT	1.39054		C10orf62	4.4908			FBXL22	2.09562
PLCB2	1.44256		CYP21A2	4.47496			ZNF554	2.0953
PLCG2	1.71483		SERPINI1	4.45593			EPHX2	2.09452
PLD2	1.60523		PAM	4.45346			FYN	2.09357
PLEC	1.51262		GALC	4.44129			KIF24	2.08993
SEPT4	2.62818		GPR65	4.44129			SDHA	2.08791
POLE2	1.70825		PRSS16	4.4318			GSS	2.08786
POLR2E	3.96063		ANKRD34B	4.41908			IL36G	2.08783
POU2AF1	1.71153		CNGA4	4.4168			RAB21	2.08186
PPIB	2.07744		FIGN	4.40671			PDCD2L	2.08034
PPID	1.46423		CLN8	4.4034			ADGRE3	2.07891
PPL	1.80211		PTCHD4	4.4023			SLC25A35	2.07746
PPP4C	1.95948		ZBTB21	4.38616			GPIHBP1	2.0744
PRKAA2	1.71794		CCR9	4.37572			LAMA3	2.07177
PRKCE	1.62534		MNAT1	4.37059			HBZ	2.07172
MAP2K3	1.82192		FAM53B	4.36754			DEPDC1B	2.07161
PRLR	1.94466		EIF4A1	4.35655			GNB1	2.06644
RELN	1.63477		CD68	4.35655			ELOA	2.06639
TMPRSS15	1.33365		TMEM132C	4.35067			PITHD1	2.06524
PRSS8	1.43938		MORN4	4.35067			PPL	2.06469
HTRA1	1.53874		LRRC4	4.34582			KLC1	2.06223
PSG9	2.42181		WDR4	4.34486			METTL15	2.06095
PSMC3	10.3345		MUC19	4.3439			RBBP9	2.05953
PSMC6	2.662		KIF3C	4.34199			ADM2	2.05557
PSMD9	1.56108		KLF7	4.33819			CREB3L2	2.05524
PTGFR	1.55791		DCC	4.33724			ERI1	2.05483
PTMS	1.47223		CHADL	4.32883			NT5C2	2.05133
PTPN1	1.86605		HIST1H2BN	4.31966			OR10AG1	2.04747
PTPN4	1.36356		HIGD1B	4.31785			OR5F1	2.04686
PTPN6	1.77924		EFTUD2	4.31785			SNX29	2.04637
PTPN12	1.3364		CEACAM21	4.31605			ZFP91	2.04027
PTPRE	1.53635		SND1	4.31069			CTSB	2.0383
PTPRJ	2.66688		ECI1	4.29671			NBPF6	2.03535
PURA	2.59013		RNPS1	4.29671			NFE2L2	2.03105
RAB3IL1	2.59395		ABCA3	4.29671			ZNF682	2.02962
RAC1	1.31364		L3MBTL2	4.29585			UPF3A	2.02813
RAD51C	1.97245		C6orf183	4.29499			GNS	2.02228
RAF1	1.54218		DLGAP5	4.29158			ILF2	2.02104
RANGAP1	1.77653		MFSD7	4.28904			SPRR4	2.02085
RAPSN	8.01678		IQGAP2	4.27654			ARL15	2.0139
RARB	1.49327		METTL10	4.27654			NARS2	2.01312
RBBP4	2.11831		ITIH1	4.27327			GPR180	2.01308
RBMS1	1.42602		RANGAP1	4.266			LTBR	2.0117
RDH5	1.42812		LGALS3	4.26201			CYP4X1	2.00984
RFX3	1.97045		NKX2-5	4.25964			RNF166	2.0092
RFX4	2.50037		EP300	4.24795			PFKFB2	2.00767
RGS16	1.47238		C10orf76	4.2321			FBXW8	2.00713
RHO	1.41795		CLVS2	4.22988			FRRS1	2.00675
RLF	1.8616		CYP17A1	4.22768			OR5I1	2.00197
RNF5	2.67502		SCN2A	4.21968			OR51S1	1.99628
ABCE1	2.56446		SSBP4	4.21467			CABP1	1.99611
RORA	1.45588		ISYNA1	4.21467			GIPC1	1.99383
RPE	2.70939		FAM175B	4.21467			TMEM106B	1.99042
RPE65	1.6438		ORC4	4.21112			OR5W2	1.99034
RPL13	1.48207		SLC9A9	4.20412			RIN1	1.98991
RPS6	1.44021		TMEM256	4.20343			TNK2	1.98894
RPS8	1.95175		ATF7	4.19654			NOD2	1.98619
RRBP1	1.51354		UGT2A2	4.19586			MRPL36	1.98414
RYR1	1.34025		UGT2A1	4.19586			ERAP1	1.9823
SALL1	2.13842		ITIH3	4.18776			CDK5R1	1.98101
SC5D	1.79735		FYCO1	4.1798			CD44	1.98005
SCN4A	1.3193		EDC3	4.16813			CSRNP2	1.97935
SCTR	2.01226		GIN1	4.1549			TRIB3	1.9791
CXCL11	1.84409		ELL	4.15181			GAK	1.97869
SDHB	1.47166		PPIP5K2	4.15058			ZNF462	1.97662
SDHD	1.55496		CEACAM4	4.1463			NHSL1	1.97605
SELE	1.44581		ACVR2A	4.14206			TEX37	1.97551
SFTPD	1.72255		DRC3	4.12901			INO80D	1.97281
SIM2	1.55368		AP2M1	4.12552			MAL	1.97171
SKP1	1.58031		ABCF3	4.12552			MRPL48	1.97017
SLA	2.28319		SKOR2	4.12263			RBMS3	1.96795
SLC2A5	1.68502		RPP25	4.11691			RANBP17	1.96601
SMTN	1.60928		PTPRN2	4.11691			TRIM51	1.96545
SLC6A6	1.44998		LCE3B	4.11577			MRPS5	1.96537
SLC20A2	2.45727		SLC6A13	4.11295			DNAJC7	1.96521
HLTF	1.30159		GRM7	4.10735			CACFD1	1.96457
SMARCB1	1.3641		GJC1	4.10624			OR8K1	1.9619
SNAI1	1.377		ITIH4	4.10292			SPRR2E	1.95617
SNCA	1.94302		MUSTN1	4.10182			DGKQ	1.9557
FSCN1	2.40486		TMEM110-MUSTN1	4.10182			TFCP2	1.95386
SNX1	2.32718		IER3IP1	4.09205			GOLGA7	1.95074
SORL1	6.40839		FRA10AC1	4.09098			GINS4	1.94892
SOS1	1.30614		NEK4	4.08672			PARVB	1.94642
UAP1	2.15815		ATP5G2	4.08302			SLC2A13	1.94592
SPG7	1.6931		HDHD2	4.08145			CAVIN1	1.94569
SPI1	13.0865		THG1L	4.07624			TEX264	1.945
SPRR2F	1.4065		LSM11	4.07624			CDS1	1.94226
SPTA1	1.54719		PPCDC	4.06298			ADI1	1.93892
AKR1D1	1.52681		CCDC69	4.05601			RBM17	1.93859
SSBP1	1.45712		ASB1	4.05208			SORBS3	1.93689
AURKA	3.05652		CXCR6	4.04818			TMEM175	1.9364
STX3	1.52701		IRAK2	4.04479			PDCD6	1.9364
STX4	1.34283		DLG5	4.03953			GPI	1.93614
STX5	1.45931		DVL3	4.02872			METRN	1.93528
STXBP1	1.70485		RDH10	4.02549			HABP4	1.93405
STYX	2.92416		SCCPDH	4.01773			NCLN	1.9339
SULT1C2	1.91268		EPB41	4.01592			ZNF514	1.9336
SUPT4H1	5.24608		ATPAF2	4.01011			LRRIQ1	1.93319
VAMP1	1.82649		VAMP2	4.00305			ST6GALNAC4	1.93263
SYN2	1.45195		LACTB	4.00261			MSC	1.93181
SYPL1	2.06155		GNAO1	3.99775			LSM3	1.93144
TACR3	1.547		ZNF391	3.99388			UBAP1	1.92735
TAGLN	1.76861		FAM171A1	3.9917			ACSM5	1.92412
TAF6	2.46348		DYNC1I1	3.98297			SLC2A6	1.91909
TAL2	2.31707		LCE3A	3.96465			HPD	1.91721
TAP2	1.93464		PER1	3.96134			C12orf40	1.91664
TARS	1.38781		RCAN2	3.95912			FKBP10	1.91546
TAT	2.10879		MED17	3.95063			SNAI3	1.91535
TBX1	1.90605		VSTM5	3.95063			EXTL2	1.91478
TBX6	1.67652		SCGN	3.94958			PAX3	1.91062
TCF7	1.4439		ANO2	3.93476			TMEM252	1.91031
ZEB1	1.94719		GPRIN3	3.93144			TRIM65	1.90995
PPP1R11	1.90243		ZNF423	3.91389			PCNX2	1.90967
TEAD1	3.31367		FANCA	3.89035			ACTN4	1.9083
TEK	1.78566		PDE4D	3.87364			HACD2	1.90658
TG	1.58769		DSCAM	3.86941			RAB5C	1.90389
TGM4	2.44975		GATA4	3.86012			TMEM212	1.90337
THRA	2.58122		PYGB	3.86012			GPR39	1.90292
TIMP4	1.60448		ABHD12	3.86012			HOGA1	1.90167
TJP1	1.3055		GRIA1	3.85981			BAMBI	1.89894
NR2E1	1.75414		MDGA2	3.85387			MS4A10	1.89739
TSPAN4	1.30433		KTN1	3.84952			FSD2	1.89733
TM7SF2	2.06909		KDM5A	3.84664			ELOVL7	1.89531
CLEC3B	3.9665		YIPF1	3.84164			NDUFC2	1.89276
TNXB	2.93637		HIST1H2BL	3.82757			SQSTM1	1.89181
TPBG	1.82857		HIST1H2AI	3.82757			MIOX	1.88723
TPD52	1.41872		HIST1H3H	3.82757			ITSN2	1.88693
TPD52L2	1.84906		HIST1H2AJ	3.82757			SENP8	1.88582
TPM4	1.3698		HIST1H2BM	3.82757			TRPM6	1.88353
TPT1	2.10125		HIST1H4J	3.82757			SPRR2B	1.8818
NR2C1	1.3923		HIST1H4K	3.82757			CFAP251	1.8815
TRAF3	1.64608		HIST1H2AK	3.82757			RAB22A	1.88068
TRIO	1.71316		CCT3	3.80967			PSMD11	1.87854
TRPC4	1.41193		TSACC	3.80967			SPPL3	1.87742
TRPS1	2.42733		VIT	3.80688			OR5M9	1.87716
TTN	1.76105		RPL7	3.8041			ZNF165	1.8738
TUBB2A	1.43568		ATP4B	3.80162			LCT	1.87157
UBE2L3	4.62877		PCED1A	3.77682			PCSK1	1.86899
UBE2N	3.42231		EIF2B5	3.75203			DHX29	1.86883
UGT2B17	2.79545		ATP1B2	3.74958			FBXL5	1.8688
UQCRC1	1.72338		PBRM1	3.72816			SOCS7	1.86861
UROD	2.17115		GNL3	3.72816			HOMER1	1.86851
USF2	1.30345		GLT8D1	3.72816			STOML2	1.86707
VAV1	2.49013		SPCS1	3.72816			CHAT	1.86299
VEGFC	1.33588		LAMA2	3.7144			PLIN2	1.86246
BEST1	1.99922		KCNIP4	3.70788			USP35	1.86176
WIPF1	2.1334		CAMP	3.69465			RHBDF1	1.8616
WNT1	1.42614		SAMD4A	3.69045			LYPLA2	1.86088
WNT3	1.35525		ALOXE3	3.67162			BNC1	1.86028
WNT8B	2.14166		HES7	3.67162			CYP27B1	1.86022
XRCC5	1.78191		IP6K2	3.66768			OR52R1	1.85886
YES1	1.66194		FYN	3.66288			ATPSCKMT	1.8577
ZFPL1	2.53015		UBTD1	3.65956			PPP1R13L	1.85755
ZNF3	2.48816		SASH1	3.65506			RCOR1	1.85752
ZNF17	1.58336		HLA-DRA	3.62886			NDUFB1	1.85462
ZNF19	2.16302		SLC17A1	3.597			GEMIN6	1.8531
ZNF35	3.68903		TTC27	3.5867			C9orf78	1.85232
ZKSCAN1	3.21761		VPS16	3.55838			ACLY	1.8514
ZSCAN21	2.76088		EGFL8	3.5544			GTF2E1	1.85134
ZNF45	1.49339		AGPAT1	3.5544			GTF3C6	1.85035
ZBTB25	1.46077		RNF5	3.5544			NME4	1.84888
ZNF217	1.46111		AGER	3.5544			MAP2K5	1.84863
ZYX	6.3514		PBX2	3.5544			XPR1	1.84676
LAPTM5	3.23032		GPSM3	3.5544			KMT2C	1.84466
TUBA1A	1.35946		NOTCH4	3.5544			SIM2	1.84454
ALDH5A1	1.51515		BTNL2	3.52297			ADORA1	1.84233
PRRC2A	3.24485		SEMA4A	3.5211			MCM6	1.84137
BAG6	3.12507		PSORS1C1	3.51703			BNIPL	1.8407
GPANK1	3.0927		CDSN	3.51703			FAM228B	1.83989
ABHD16A	2.27441		PSORS1C2	3.51703			KCNQ3	1.83881
LST1	1.46874		CCHCR1	3.51703			GPR183	1.83782
MAFK	2.37355		SLC17A3	3.48037			FAM214B	1.8336
SHOC2	2.60949		ZNF165	3.47567			OR8J1	1.83268
FOSL1	1.5261		PACRG	3.44626			DCAF12	1.83047
AAAS	1.34417		MCM9	3.43915			TGDS	1.83021
CDK2AP1	1.67453		SGCZ	3.40782			SGTA	1.82906
ELL	4.58538		ZNF589	3.37882			SPRR1A	1.82743
TRRAP	1.51025		NME6	3.37882			DEFB136	1.82728
PICALM	17.1886		RPS6KA2	3.36622			PRAG1	1.82716
AXIN1	1.58668		PPRC1	3.36452			PRMT8	1.82699
AXIN2	1.37511		PTPRA	3.36439			NUDT2	1.82646
H2AC17	1.85248		ASF1A	3.35707			CCDC177	1.82574
H2BC9	1.85201		LOC554223	3.31426			ACAA1	1.8244
H2BC10	2.23724		HIST1H2AA	3.29148			TOPAZ1	1.8244
H2BC17	1.54664		HIST1H2BA	3.29148			OR14A16	1.82391
H3C8	2.32043		SLC25A44	3.27901			MGMT	1.82336
H3C12	1.73824		CCDC77	3.23359			TCAIM	1.82316
H4C8	2.20073		HIST1H4C	3.21263			NPR1	1.82301
H4C14	1.40738		MCUR1	3.21009			C4orf45	1.82197
SLC25A11	2.22197		LSM2	3.19236			CCNH	1.82013
NCK2	2.40451		HSPA1L	3.19236			MYO9A	1.81901
DYRK3	1.86395		HSPA1A	3.19236			DIP2B	1.81733
DOC2A	1.60642		TFDP1	3.19179			CNNM2	1.81619
CUL1	1.41818		ZDHHC14	3.19153			GALE	1.81392
HIRIP3	1.30342		HIST1H1T	3.18807			MRNIP	1.81293
GALR3	1.54022		HIST1H2BC	3.18743			RMI1	1.80768
RGS5	1.65687		HIST1H2AC	3.18743			CHERP	1.8076
SLC43A1	2.05939		GPR6	3.18045			CACNA2D2	1.80671
PKP4	2.0367		MICB	3.1798			DHX30	1.80421
ITGA8	1.66105		PKHD1	3.17237			NA	1.80322
AGPS	1.60095		NCR2	3.16312			THEMIS	1.80297
PIAS1	2.1153		AKAP7	3.16304			RPL29	1.80154
DEGS1	1.66212		LRRC1	3.15724			STK25	1.80077
MADD	6.14065		LMBRD1	3.15034			CTU2	1.79901
MKNK1	1.71514		NUS1	3.13724			NT5C3B	1.79817
PRKRA	2.39647		GFRA4	3.11691			TCOF1	1.79743
FAM193A	1.36812		ADAM33	3.11691			SETD1B	1.7955
KLF7	2.60614		SIGLEC1	3.11691			COL9A3	1.79301
CADPS	1.43273		ORC3	3.11179			TJAP1	1.79218
EIF4EBP3	1.79062		TRERF1	3.06741			HNRNPK	1.79003
AOC3	2.20745		ARHGAP18	3.05877			CEP55	1.78944
PTCH2	2.10717		IRF4	3.04836			ACAD10	1.78915
NCOA1	1.92735		HFE	3.03961			OR4A16	1.78899
LAMTOR3	1.76792		VARS	3.03527			CLDN14	1.7888
EIF3G	1.69133		SOBP	3.02374			PLPP1	1.78699
EIF4G3	3.4388		FGF8	3.00393			NPAS4	1.78622
MARCO	1.61366		NPM3	3.00393			SNRNP25	1.78563
CTNNAL1	1.61037		MGEA5	3.00393			LETMD1	1.78553
CRADD	1.76978		HLA-DOA	2.99114			OSBPL3	1.78481
SIGLEC5	1.84683		DNAH8	2.97465			C5orf47	1.78405
DPM1	1.6749		PDE10A	2.92713			SIGLEC6	1.78149
NRP1	1.87134		MRS2	2.91432			DNTTIP2	1.78091
PROM1	1.31442		HIST1H2BK	2.85387			MRPS24	1.78089
HCAR3	1.91557		HIST1H2AH	2.85387			C2orf91	1.78021
VNN1	1.31076		SLC35F1	2.82681			UBL5	1.77866
SQSTM1	3.29445		ART3	2.78076			OR10Q1	1.77606
ZPR1	2.22789		ZFR	2.68194			CILK1	1.77588
EIF2B3	3.13818		MGAT5	2.60183			COA8	1.77588
BUD31	2.13963		UST	2.55909			STX6	1.77368
MTMR2	2.44395		C6orf10	2.54975			FAM174B	1.77363
MBD4	2.3127		GRK5	2.4959			PTGER1	1.77343
STBD1	2.2855		FAM126A	2.4432			GID4	1.77304
RHBDL1	1.75738		MPP5	2.20691			POT1	1.77283
SH2D2A	1.53024		ATP6V1D	2.20691			RIOX2	1.7727
PAPSS1	1.59534		EIF2S1	2.20691			ATP5PB	1.77027
DIRAS3	3.55527		PNRC1	2.20551			SMARCC1	1.76919
USP14	1.90087		SRSF12	2.20551			HLA-DQA2	1.76835
USP6	1.51034		ARG2	2.16226			CGRRF1	1.76787
USP8	3.32788		VTI1B	2.13775			SEMA6A	1.76769
FCGR2C	1.37097		RDH11	2.13775			OR8A1	1.76746
MTMR4	2.34649		RDH12	2.00998			CMKLR1	1.76541
MTA1	3.35063		FAM71D	1.95892			KLHL10	1.76495
SLC16A5	3.73316		VPS13C	1.95331			POLR3K	1.76326
CCNE2	1.86455		OPCML	1.88941			TNRC6B	1.76253
RABEP1	3.24085		CSNK1G2	1.86487			DRG2	1.76143
ARHGEF1	1.48592		BTBD2	1.86487			NA	1.76115
NEMF	1.65236		PROM1	1.76566			OR5M10	1.76055
PCSK7	1.84548		SPATA32	1.76447			LPXN	1.7595
SCAF11	1.87543		SLC4A11	1.75065			OR8B12	1.7586
AP4M1	2.35709		C20orf194	1.75065			MYBPH	1.75845
VAPB	1.68002		IL6	1.66959			KPNB1	1.75766
AIMP1	1.59838		JAM3	1.47106			HLA-DQB2	1.75753
TSPOAP1	4.5222		SLC5A2	1.45967			ALX1	1.75738
COPS2	1.5661		C16orf58	1.45967			C15orf61	1.75592
GTF3C5	2.59496						ACY1	1.75552
GLP2R	1.73081						CD2BP2	1.75515
ITGBL1	1.64631						TPD52L2	1.75434
PPT2	2.92614						MSRA	1.75419
LIPG	1.47847						OXCT1	1.7538
PEX16	2.12995						PHETA1	1.75358
CDYL	1.45741						TIMM21	1.7488
QKI	1.52295						NAB2	1.74856
EIF2AK3	1.44172						CYLD	1.748
PICK1	1.30492						OGFR	1.74761
MAPK8IP1	2.918						TCF4	1.74737
AKAP5	1.72478						SPRR2A	1.74661
ADAMTS1	1.89265						CRNN	1.74565
GDF15	3.26055						TJP2	1.74494
NPEPPS	2.95794						CD1D	1.7442
GOSR1	1.66462						WDR26	1.74319
BAG5	1.30736						TMEM107	1.74254
ZNF254	1.75205						WDR77	1.74199
ATP5MF	1.44708						CHST13	1.74069
BCAR1	1.70309						HECW1	1.7395
APOBEC3B	1.34569						MYO15A	1.73805
CREB5	1.93704						MYO1D	1.73805
NFE2L3	3.28974						LTBP3	1.73781
CARTPT	1.48873						HOXA4	1.73495
AATK	1.36707						CYP4Z1	1.73339
SOCS5	1.88968						ACSS2	1.73318
N4BP1	1.77599						KLHL11	1.73135
ESPL1	1.80366						CRYBG3	1.72874
CEP57	3.23977						BRAP	1.72855
USP6NL	1.42692						TSFM	1.72735
FAM131B	5.12483						IRX4	1.72714
RAB11FIP3	1.8181						SPATC1	1.72573
SETD1A	1.56679						ZNRD2	1.72501
TBKBP1	2.97261						FAM171A1	1.72485
PCLAF	1.9189						KIF18A	1.72432
ATG13	3.53945						ZKSCAN8	1.7237
RIMS3	2.55272						SRSF12	1.7237
BMS1	2.55134						OR2M5	1.72368
CKAP5	4.05229						NUBPL	1.72214
MAML1	4.00652						VAMP2	1.72152
PHYHIP	1.86372						IER5	1.72129
ARHGAP11A	1.42554						SPRR3	1.72015
SPATA2	2.08056						OR5M3	1.72006
ZNF623	1.39413						ANXA1	1.71988
MED24	1.96453						SMOC1	1.71908
AREL1	4.5986						OR10S1	1.71888
LRRC37A	1.70779						SREBF1	1.71731
SGSM2	1.76523						MTRR	1.71631
ARHGAP44	1.67111						LRRC73	1.71579
CD302	1.35682						WNT9B	1.71523
DLEC1	1.42418						CXXC1	1.71447
SLC23A2	1.61106						OR4C15	1.71307
MED13	2.46573						POLR3F	1.71059
THOC1	1.70739						NATD1	1.71052
DMTF1	2.33611						FAM89B	1.70872
PPP4R1	1.47619						ZNF197	1.70659
AKT3	1.59685						C3orf22	1.70648
NAALADL1	2.918						UNK	1.70613
SRA1	1.67009						DTYMK	1.70611
SAE1	1.80288						TASOR2	1.70564
NR1H3	5.24771						FAM110B	1.70509
ARPC1B	1.90445						MARCHF9	1.70395
TSPAN5	1.38186						UNC79	1.70307
CEBPZ	2.12977						RBM28	1.70252
PDZK1IP1	1.30269						CCDC71L	1.70215
LPCAT3	1.74215						PAPSS1	1.70211
CHST4	1.67566						GLB1L3	1.70141
ZNF197	3.95436						UBA2	1.70106
MPHOSPH9	1.65437						BTF3L4	1.69967
CALCRL	1.31098						KLF2	1.69934
HRSP12	1.3999						COL24A1	1.69819
STUB1	1.70666						CNTF	1.6975
LILRB2	2.20456						TP53INP2	1.69702
EIF1B	1.84667						EEF1AKMT3	1.6965
BCKDK	1.42562						SERF1B	1.69512
PAK4	1.36499						UBXN4	1.69315
APBB3	1.68774						MRPL28	1.6927
TLR6	1.35664						OR4C16	1.69257
TRIM22	1.8642						BDNF	1.6924
ABCA7	11.5045						NSG2	1.6915
ANAPC10	2.67095						MYOF	1.69067
WFDC2	1.89367						REG3A	1.68946
CDIPT	1.3572						CHI3L1	1.68929
CDC42EP2	1.54654						ARPC1A	1.68929
EMG1	1.75701						RHOG	1.68789
VAV3	1.75198						FAM200B	1.6867
FST	2.87916						FAF1	1.68563
ATP5H	4.06932						PADI2	1.68376
NXF1	1.6902						SLC17A6	1.68369
SEC23B	1.62022						DHX57	1.68269
CRTAP	1.69674						HDGFL3	1.67921
SEMA4D	2.18623						DUSP8	1.67906
FBLN5	2.0727						DRAXIN	1.67902
UBD	1.44575						AVIL	1.67768
ARPC1A	2.37571						ZFP3	1.67726
AGPAT1	2.61979						LOC100505797	1.67671
AGPAT2	1.545						HECTD1	1.6759
RABAC1	1.86848						INPP5B	1.67457
CCT4	1.54742						TXNDC12	1.67448
TXNRD2	1.7921						METTL1	1.6717
DRAP1	1.5793						DNER	1.67152
MXD4	1.39246						ZKSCAN4	1.67085
TRIM3	2.08546						SMN1	1.67074
ERLIN1	1.70721						KIAA0232	1.66888
RBCK1	2.19878						LOC101928093	1.66835
TAF6L	2.02936						XRCC2	1.6677
IGF2BP3	1.34134						P3H4	1.6672
CAMKK2	1.96341						ATPAF2	1.66698
CELF1	7.01145						ZNF207	1.66545
TSBP1	5.90174						TBCEL	1.66498
CCT6B	1.89395						TP53BP2	1.66412
STAG3	2.74528						OR5AP2	1.66376
RBBP9	1.31429						RGS17	1.6632
MASP2	1.73513						SLC11A2	1.66228
ARPP19	1.75294						MTREX	1.6622
IQGAP2	2.19074						PRXL2C	1.66216
SPINT3	1.86896						IL17F	1.6616
CFHR4	2.01594						MAX	1.66099
MALT1	1.76637						MFSD2A	1.66017
CPSF4	1.92118						KIF27	1.65973
SUGT1	1.97392						LIMA1	1.65956
EHMT2	1.9617						MIER2	1.65906
APOBEC2	7.96827						AKAP7	1.65902
POP1	1.46002						OR5M1	1.65878
CLP1	2.05434						PIRT	1.65746
FERMT2	4.89364						OR4A15	1.65687
COPS6	2.21869						ST3GAL6	1.65557
MAPRE2	1.44431						KLC3	1.65531
LILRB4	1.4195						ZSCAN16	1.65431
KDELR2	1.68599						PCDHA13	1.6533
VAX1	1.70065						DYRK1A	1.65314
LILRA3	2.39226						SEPHS2	1.65288
NUDT21	1.60017						PRPF8	1.65267
WWP2	2.49705						GFRA2	1.65265
CNMD	1.42067						NDUFS6	1.65197
TRIOBP	2.25927						MAPK9	1.65168
ADAM30	1.69003						ADH1A	1.65103
ADAM29	1.74975						BLOC1S1	1.6501
ADAMTS5	1.34814						LOC645177	1.64905
PTPN21	2.19394						OR5AR1	1.64904
PRDM7	1.88313						CERS4	1.64857
HHLA3	1.81539						CPSF2	1.6483
NUDT4	2.09063						HPF1	1.64678
FSTL1	2.11929						HMGCL	1.64459
CELF3	1.72228						SLC8A3	1.64304
AKAP13	1.4285						NR4A2	1.64178
DUSP10	1.35935						FANCG	1.64128
RNF139	1.36462						MYCBP	1.64104
GPR176	2.94715						CCDC149	1.64089
DUSP12	1.73717						BANF1	1.64049
TREX1	1.50651						KDM6B	1.64028
MGAT4B	3.65175						BAG5	1.63859
CYP4F8	2.29473						EVL	1.63829
B4GALT7	1.7184						CCDC50	1.63812
TMC6	1.627						GJA9	1.63771
PHB2	1.79363						DBNL	1.63746
PDAP1	1.88776						QRFPR	1.6362
CBX3	3.40109						PLEKHM1	1.63612
XRN2	1.44391						ACTR2	1.63607
ATF5	1.31704						MBD3L1	1.63597
COPZ1	1.73943						ZNF492	1.63541
ZNF652	1.93779						PRRT4	1.6347
PPM1E	3.34995						MUC19	1.63444
LMTK2	1.36005						THAP2	1.63371
PLEKHA6	1.60901						HOXA3	1.63289
ZBTB1	2.12147						CNDP1	1.63222
NCBP2	1.47638						HP1BP3	1.63192
RPIA	1.52542						ZNF852	1.63078
PCNX	1.30336						SLC35F6	1.6296
KDM2A	1.3103						WNT3	1.62851
CEP152	1.93293						CCDC69	1.6284
EXOSC7	3.40806						OR4C11	1.62797
KDM4B	1.55846						SIRT5	1.62714
DOPEY1	1.95916						HDHD3	1.62681
PHLPP2	2.02511						SRSF7	1.62666
MYT1L	1.43956						NNT	1.62633
KIF21B	4.64651						TBC1D30	1.6261
CLUAP1	1.72681						MYCT1	1.62606
TRIM35	2.44285						GPR17	1.62386
DDN	1.38009						OR52A1	1.62364
PLXND1	1.37822						RAMAC	1.6228
GPATCH8	1.82501						XRCC3	1.62202
GRAMD4	1.54725						NA	1.62138
EFR3A	1.48113						PGBD3	1.62117
SLC35D1	1.46414						ZNF784	1.62077
RCOR1	1.69771						ITGAL	1.61975
TMEM131L	1.35044						CASP6	1.61869
PACS2	2.11022						EPHX3	1.61807
BOP1	1.68986						PLAGL1	1.6171
SCFD1	1.34921						NFIB	1.61681
MCF2L	1.72693						PFAS	1.61681
FAM208A	2.32641						RAPSN	1.61593
CLEC16A	2.99939						OR5M11	1.61543
NUP160	8.49614						CAMSAP1	1.61515
SLC9A8	2.5883						SLC22A23	1.61506
NEDD4L	2.04132						MORN4	1.61427
USP24	3.69984						JCHAIN	1.61364
FNBP4	9.2707						SH2D2A	1.61316
ADNP	1.38246						CTBP1	1.61282
CRB1	1.5752						ABCC2	1.61249
GPR161	1.30551						ERCC2	1.61124
RHOQ	1.31819						AQP3	1.61032
TARDBP	1.90907						BMPR2	1.61018
HARS2	1.93957						RDH5	1.60933
ABCB9	1.97724						NOSTRIN	1.60928
GCAT	2.18015						LOC101928592	1.60672
CBX5	1.75124						TCFL5	1.60562
TRAM1	4.44793						C10orf62	1.60555
ETHE1	1.44051						ANTKMT	1.60415
BRD4	1.37671						AHRR	1.60357
MACF1	1.30193						CLK4	1.60314
KCTD2	3.92595						SKOR1	1.60302
MORC3	1.51897						USP10	1.60204
ARHGAP45	8.07761						DSPP	1.60201
RBFOX2	1.37313						LIPG	1.60176
DDAH2	1.412						NDN	1.60138
PADI4	1.70819						URGCP-MRPS24	1.60036
DAPK2	1.82215						PNPLA6	1.59995
CD2AP	6.84664						TBC1D10B	1.59919
ARFIP2	1.81045						MAD2L2	1.59913
ZKSCAN5	1.77286						TMC5	1.59891
PRKD3	2.26978						GPAT4	1.59869
SDF2L1	2.94313						CD53	1.59867
FLRT2	1.79172						HTATIP2	1.59851
FKBP8	3.06177						LRP1	1.59848
MTCH2	7.93476						SPRR1B	1.5982
SLC24A2	1.46702						C9orf135	1.59772
RASGRP3	1.59195						RASA1	1.59738
NGEF	1.69418						EIF1AD	1.59479
QPCT	1.54123						TK1	1.59469
BAMBI	2.04994						C9orf64	1.5946
POU2F3	1.52694						ERBIN	1.59418
WHRN	2.12447						AMMECR1L	1.59343
PRKD2	2.21284						HERC1	1.59343
IFFO1	2.03229						SLC2A1	1.59246
CCDC28A	1.54696						ZNF35	1.59239
ZDHHC5	1.67207						PIMREG	1.59222
ZNF521	2.47644						PSME3IP1	1.59195
SOSTDC1	2.97106						PLEKHD1	1.59108
WWTR1	1.64218						SLC18A3	1.59073
SEC31B	2.3622						PCDHA12	1.59032
RNF167	1.95323						WEE1	1.59019
PTCD1	1.92845						CPEB4	1.58991
SUSD5	1.43373						CCT5	1.5897
DECR2	1.33075						SPRR2D	1.58959
CCDC9	2.02926						EIF2AK1	1.58941
WIPI2	1.75923						AKAP12	1.58892
TANC2	3.34014						SLCO2B1	1.58759
TRPC4AP	2.66916						BMP5	1.58739
STAP1	1.80283						EGR3	1.58705
OR2L2	2.11363						PIWIL2	1.58621
CABYR	1.444						YIPF3	1.58591
FBXW8	1.43188						TAS2R41	1.58474
FBXO25	2.05579						LOC101929087	1.58364
FBXO24	1.43004						CIAPIN1	1.58117
GALNT8	1.6522						TMEM19	1.58094
SEZ6L2	1.58246						EXOC4	1.58067
OR8G2P	1.46954						ZNF835	1.58039
OR8G1	1.32512						HOMER2	1.57963
TIMM10B	1.86665						HK1	1.57932
CKAP2	1.53558						AGFG2	1.57889
OR2V1	1.90918						COQ9	1.57723
SH3YL1	2.62244						ZNF536	1.57721
SND1	2.55083						KASH5	1.5768
DAPP1	1.60758						CD74	1.57633
BBC3	1.84134						ADARB1	1.57574
DKK3	1.63765						FHL3	1.57566
INVS	1.66328						PCDHA11	1.57473
PALD1	2.12177						CYP4A22	1.57336
GLS2	1.48222						CST6	1.57292
DISC1	1.62414						CSPG5	1.5719
HCAR1	1.83636						CCDC78	1.5719
PDCD4	2.90156						PTAR1	1.5693
SPINK4	1.73563						OR6K6	1.56722
MOCS3	1.47033						KPNA5	1.56695
NKIRAS2	1.45243						TACR2	1.5662
DEXI	3.76965						UQCRC2	1.56476
GIT1	2.1968						PCDHAC1	1.56365
C19orf53	1.50382						CFAP97D2	1.56334
MRPL42	2.04878						SFPQ	1.56331
TMPRSS11E	2.26963						OR5AC2	1.56253
TMEM230	2.6091						DKKL1	1.56234
ORMDL2	1.38079						DMRTA2	1.5607
DNAJC15	1.52683						SLC10A7	1.55945
ANKRD11	1.42952						SLC17A8	1.55794
UHRF1	1.77219						TRIM48	1.55707
BLNK	1.56976						IGL	1.55658
SNX10	1.43859						ARMH4	1.556
STRN4	1.90194						POLR2C	1.55594
SAC3D1	2.9943						NLRP12	1.55547
SNX15	3.21661						RMI2	1.55475
PILRB	2.26634						PPP1R1C	1.55461
PILRA	2.9057						MTF1	1.55404
FSCN3	3.03535						FAM83H	1.55399
ERO1L	2.15248						ULK4	1.55334
NT5C	1.48648						NKAPL	1.55214
ZNRD1	2.10622						INSYN2A	1.55142
PIK3R4	2.1794						ALKBH8	1.5504
CDR2L	4.07191						XPC	1.54974
MINK1	3.65111						SAP25	1.54877
UBQLN3	1.30374						INMT	1.54835
SLC45A1	2.08537						KIRREL1	1.54662
HP1BP3	1.83059						RABL3	1.5463
HDGFRP3	1.4344						MYD88	1.54586
TAS2R3	1.65374						TAF5L	1.54573
TAS2R4	1.56212						LGALS7	1.54537
NTM	2.70191						TMEM42	1.54461
PDE11A	1.50202						PHYHIPL	1.54458
TMED7	2.43481						DRC3	1.54429
VPS36	1.51476						ZASP	1.54385
CELA2B	2.30675						WFIKKN2	1.54373
ST8SIA3	1.47538						OR5B21	1.54359
FCF1	4.61867						FH	1.54347
SIDT2	1.91557						BORCS6	1.54278
RRNAD1	1.53793						HOOK3	1.54272
SH3GLB1	1.77718						AAGAB	1.54236
LACTB2	4.78196						HIGD1C	1.54197
ING4	2.30542						S1PR1	1.54139
MRNIP	1.82062						CFI	1.54117
EGFL7	1.62439						PGAM2	1.54109
SHISA5	1.74323						GDNF	1.53997
TBC1D7	1.65386						MYH7B	1.53978
CLEC1B	1.36818						RNF135	1.53951
KLF3	1.61919						S100Z	1.53928
ZDHHC3	2.37473						PIGO	1.53882
REEP2	2.00306						CD1C	1.53801
NME8	2.65551						NADK	1.53789
WAC	3.52863						TSHB	1.53693
ARL17A	1.355						SIRT2	1.53653
ARL6IP4	1.45901						CEP78	1.53527
THEM6	1.82108						PCDHAC2	1.53278
MS4A4A	19.3499						CCDC112	1.53217
CHST15	2.23091						PIP	1.53056
POLK	1.42583						CC2D1B	1.53046
DDX41	2.23809						TDRD10	1.52982
SCARA3	3.25413						MSGN1	1.52818
REV1	1.46531						SMCO4	1.52738
ISYNA1	5.39157						NPRL3	1.52717
UFC1	1.31996						NCKAP5L	1.52654
RTFDC1	2.60024						ACSM2A	1.5264
GTSE1	1.6854						RIMS4	1.52616
OSER1	2.74761						TENT2	1.52571
SIRT6	1.38417						SDHB	1.52546
RAB6B	2.34982						TRPC1	1.52533
FKBP7	3.33624						LOC101928764	1.52491
MPP6	1.30893						ADCK2	1.52462
OAZ3	1.3057						PNRC1	1.52446
GPRC5B	4.24867						ETV5	1.52353
EMCN	1.47013						LSM14A	1.5225
WWOX	1.66005						ST3GAL5	1.52233
LUC7L3	3.29873						EIF2AK3	1.522
SYT17	2.2105						ZNF510	1.52155
RAB8B	1.46705						FNTB	1.5205
INPP5K	1.31509						HSPA8	1.51873
ZAK	2.28883						ERCC6	1.51787
KDM3B	1.5583						EML4	1.51728
CALML5	1.32341						FOXJ2	1.51694
FXYD5	1.68548						ANKRD61	1.51583
CSNK1G1	2.75301						RRAS2	1.51533
BRWD1	1.31444						IGFBP7	1.5151
TSPEAR	1.49602						EDN1	1.5147
TREM2	7.752						CHMP1B	1.51451
TREM1	1.5759						PTH2	1.51441
ATAD2B	1.38518						NA	1.51428
PRR13	1.40153						MAPK15	1.51299
ANKIB1	1.57329						NDUFC2-KCTD14	1.51285
NLE1	1.77222						GRP	1.51248
RNF216	1.69728						PCDHA10	1.51182
OTULINL	2.39569						GMFG	1.51132
SMOX	2.73403						TOM1L2	1.51098
ASNSD1	1.39141						CRB2	1.51094
FAM193B	3.69319						DPH5	1.51018
GNB1L	1.70259						U2SURP	1.5089
EQTN	1.40498						HPSE	1.50746
FBXL19	1.74516						YIF1A	1.50695
FAM63B	4.17998						DECR2	1.50656
TBC1D13	1.44501						RANBP9	1.50643
WDR74	1.47537						PCDHA8	1.50576
TMEM106B	2.84759						NFYC	1.50568
TMED9	1.69706						GAB2	1.50562
LEPROT	1.57295						CENPA	1.50547
HYDIN	2.16632						LONRF2	1.50511
TET2	1.40707						LOC101927789	1.50487
TRIT1	4.69095						NOL7	1.50426
TRPM7	3.20645						LOC401040	1.50335
WDR55	1.64304						ASB4	1.50278
PIGG	1.51125						H2AC14	1.50206
FNBP1L	1.54129						ETFRF1	1.50128
DCAF16	1.33047						C1QL1	1.50074
ZCCHC2	2.03901						PRKACG	1.50046
ANKHD1	2.16698						PCDHA9	1.50024
RNF43	3.38895						TMEM154	1.49985
LIME1	1.39201						OR5H1	1.49923
KANSL2	1.76168						AIMP2	1.4992
ABITRAM	1.64331						DMBT1	1.49895
MRPL16	1.50987						MAP4	1.49815
ODAM	1.58544						CYP26C1	1.49733
CLN6	1.49271						NLK	1.49715
ACSM5	1.97192						PCDHA7	1.49647
ZNF770	1.32512						OC90	1.49568
TESC	1.3603						RPF2	1.49499
TTC22	1.69821						CRYM	1.49431
CDCA4	1.52994						ADGRB3	1.49351
ZCWPW1	2.83514						PCDHA6	1.49343
SLC52A1	1.78341						MAT2A	1.49331
TAPBPL	1.83812						C17orf75	1.49331
RALGPS2	1.36622						URB2	1.49314
PIWIL2	1.79194						SNAPIN	1.49259
LRRC8D	2.64172						SMAD9	1.49237
C19orf73	1.61257						MYORG	1.49223
TMEM38B	1.803						CTDSP1	1.49159
SDAD1	1.41779						ZNF99	1.48967
ARHGEF10L	1.83245						UBXN2B	1.48958
SMG8	1.56708						CABLES1	1.48921
VPS13D	1.53904						TREH	1.48897
RIC8B	2.64005						THYN1	1.48829
LRRC20	1.60227						CD1A	1.48806
UBA6	1.8977						STRAP	1.488
OGFOD1	1.46036						H4C11	1.48748
CCDC25	1.72361						OR4P4	1.48697
C7orf43	2.31062						PMS2	1.48556
VPS53	1.48196						PER1	1.48533
ACOXL	1.49806						YPEL4	1.48527
CPPED1	1.33998						TMEM205	1.48517
LIN7C	1.52761						KDM4C	1.48475
C19orf66	1.7551						TMEM43	1.48474
SLC35C1	2.81						BTN2A1	1.48421
VNN3	2.00803						GTPBP2	1.48354
LAPTM4B	1.44287						C9	1.48265
TMCO6	1.46653						H2BC14	1.48257
NDUFAF7	2.27148						TEAD2	1.48249
TMEM55A	2.2518						OR4C46	1.48207
CHRNA9	1.82429						SIGLEC9	1.48204
RNPC3	1.50762						OR5B2	1.48116
PPP1R9A	1.52257						H4C12	1.48097
OTUB1	1.43022						USP6NL	1.48074
THUMPD1	1.44781						ZSCAN9	1.48072
AMBRA1	2.79261						TRAPPC12	1.48066
DEPDC1	1.49894						ACAD8	1.48057
INTS8	1.82603						USP17L10	1.47927
TRMU	1.68483						RINL	1.47822
LUC7L	1.3638						GDF3	1.47818
KDM4D	1.31052						CRYZL1	1.47743
VAC14	4.28916						FAM186A	1.47603
KBTBD4	7.99315						EIF3K	1.47537
SLF2	1.78294						CEP120	1.47501
TSR1	2.27134						PRDM11	1.47479
ZFP64	2.59791						PBX1	1.47439
DNAJC11	1.60471						ZFYVE9	1.47418
EDEM2	2.01344						CNIH2	1.47331
AGK	1.66496						CBWD3	1.47131
WDR12	1.55454						ITGAD	1.47038
IFT122	2.5442						H2AC15	1.46952
INAVA	3.29706						BCDIN3D	1.46938
PRR11	1.70976						METTL11B	1.46929
SPATA7	2.16471						FOSL2	1.4692
PAG1	1.43847						RILP	1.46907
CISD1	2.98176						RAB6A	1.46865
ZC3H15	1.6265						CAT	1.46728
ZKSCAN7	3.69758						YTHDC2	1.46702
THSD1	1.40128						PRB1	1.46691
RCC2	1.66276						POLR1G	1.46637
APOM	3.12386						HAGHL	1.46632
KLHL9	2.19758						ELSPBP1	1.46462
TEX14	2.32332						H2AC13	1.46374
ANKH	2.35355						WIPI2	1.46357
FAM214A	2.06545						MEP1A	1.46297
BTNL2	4.99996						HBM	1.46268
YLPM1	3.47496						KRTAP5-1	1.46179
MEPCE	2.80513						ALDH2	1.46159
GKN1	1.78805						ANGPTL4	1.46061
PPAN	1.7945						ATP11B	1.46028
DIABLO	1.33548						LRCH4	1.46001
CLDND1	1.39451						FCRLB	1.4599
TWNK	1.64809						ATG10	1.4597
SAR1A	1.49213						TLX3	1.45876
SLC2A4RG	1.35785						TBC1D15	1.45709
ZC3HAV1	1.80452						ZNF580	1.45613
STARD7	2.06358						KTI12	1.45483
SMARCAD1	1.48585						FNTA	1.45483
DHX33	1.45464						UBE2Q1	1.45468
FEM1C	1.83085						POLR1C	1.45336
PMEPA1	2.52792						ENPEP	1.45291
MFF	1.99909						ALOX12B	1.45237
DTWD1	1.9024						CIAO3	1.45176
KIF15	2.92387						SLC39A3	1.45156
ACKR3	1.36798						TMEM98	1.44998
C16orf62	2.20624						ZNF253	1.44959
DDX24	1.32508						ZNF80	1.44942
CASS4	4.70309						KLHL33	1.44929
LPAR5	2.43334						IGFBP4	1.44877
RTN4	2.72533						VWC2L	1.44845
RALGAPB	1.51687						ARID1B	1.44835
SLURP1	1.85711						GGCX	1.44789
PHTF2	1.49254						DCUN1D1	1.44742
JPH2	1.55627						ZSCAN31	1.44568
FAM219B	1.39524						KANSL1	1.44401
ADAMTSL3	2.02869						C2orf80	1.44311
TTC7A	1.77096						ERCC6L2	1.44305
SMEK2	1.51683						PABPC4L	1.44248
RAB22A	1.78518						RAB40C	1.44248
WDR18	1.314						SMIM17	1.44226
KIAA1143	1.64013						MANEAL	1.44223
NWD2	1.4748						HOXA5	1.44123
MKL2	2.09709						YRDC	1.44087
MAVS	1.58828						TMOD1	1.44084
INTS2	2.76604						CTXN3	1.44046
MICAL3	1.53241						RAB17	1.44022
USP35	1.30292						TSPOAP1	1.43936
FAM135A	1.7603						OR5H14	1.43911
MYH7B	1.81999						FASTKD3	1.43897
FBRSL1	2.47931						OR5B17	1.43759
CACHD1	1.76198						BTN3A2	1.43741
MIER1	1.33701						SERHL2	1.4361
SEMA4G	1.84606						KCNMB2	1.43606
PPP4R4	1.71092						CELF6	1.43596
METTL14	2.12705						HOXA2	1.43539
IGDCC4	1.94539						EPOR	1.43533
TRIB3	3.03047						CNTNAP4	1.43458
CCNB1IP1	1.309						TRIM58	1.43386
HMHB1	1.31951						H2BC13	1.43228
C6orf47	3.09473						VAX2	1.43213
ZP4	1.87121						GALM	1.43126
PCTP	1.42239						LIN7C	1.43047
LY6G5B	2.83065						CCDC159	1.43045
WIZ	1.31657						SWSAP1	1.43002
LY6G6D	1.40259						PCDHA5	1.42983
CACNG8	1.60392						RPL26L1	1.42941
CACNG6	1.44556						NYAP1	1.42933
PLEKHA1	3.46545						IFITM3	1.4283
TRPV4	1.35478						OR4C6	1.42814
C14orf93	1.41491						TBKBP1	1.42805
CELA2A	2.40431						H3C10	1.42679
SRR	1.67231						USP48	1.42624
THADA	1.72241						USP28	1.42541
CHP2	1.41895						TRAM1L1	1.42501
XPNPEP3	1.30444						PIGZ	1.42338
ZNF667	1.48721						RNF41	1.42306
GPSM3	3.00672						OR4A5	1.42288
FKBPL	2.57398						TMEM18	1.42205
PRDM15	1.37399						STK35	1.42197
LIN7B	1.50257						PAK1	1.4218
NECAB1	3.39623						NUF2	1.4214
MS4A6A	22.3469						OR6N1	1.42091
ABCG5	1.7558						PDZD9	1.42041
ABCG8	2.55663						LOC100653133	1.4204
COP1	1.31463						SMIM15	1.42002
TMEM168	3.24874						RPS27A	1.41951
PCNX4	1.82748						RNF181	1.41951
PLA2G2F	1.71043						PRPF40B	1.41931
PDIA2	1.73077						BDH1	1.41909
SMYD3	1.99559						ALG8	1.41905
TNS3	1.33212						DPH3P1	1.41896
CERK	2.37109						BECN2	1.41793
CYP3A43	1.88005						ARL2BP	1.41765
GNPNAT1	3.20468						ZNF506	1.41677
MARCHF7	2.07326						R3HCC1	1.41672
YTHDC2	2.22351						SRGAP1	1.41652
CDCP1	2.87066						METTL7A	1.4164
AGXT2	2.31431						PRKACB	1.41625
MRPL9	1.33918						IFITM1	1.41616
VPS33A	1.74129						ORC1	1.41573
PYCRL	1.302						LHX3	1.41511
C8orf33	1.41533						SLC39A14	1.41426
PLEKHA3	2.99089						CYB5D1	1.41418
LYNX1	1.84906						INPP5J	1.41341
CHID1	2.98945						HCRT	1.41322
DUSP26	1.55616						IL33	1.41319
OTUB2	1.34162						RHOBTB1	1.41297
VKORC1	1.53654						ITGA2B	1.41134
GID4	1.6855						AIF1	1.41088
ZNF655	2.69882						H2BC15	1.40987
PVRIG	1.88336						ANKRD24	1.40956
TMEM223	1.98151						HBA2	1.40885
MLPH	2.09648						PSMD12	1.40871
C11orf49	3.22841						DMXL1	1.40808
TNIP2	1.56967						GAB4	1.40805
TMEM243	1.66916						ATP6V0E1	1.40552
EFHD2	1.5952						SLCO3A1	1.40536
OR4K5	1.35472						DUSP29	1.4045
HAUS3	1.30917						PTTG1IP	1.40395
OR4K1	1.45113						GPR88	1.40344
C2orf47	2.63695						TMEM8B	1.40339
GCC1	3.05468						POLH	1.403
EFTUD1	3.99443						OCLN	1.40271
SCRN3	1.63429						ENDOU	1.40132
ARMC7	1.98234						HEBP2	1.40034
ROGDI	1.81876						LAMP3	1.40017
ARSJ	1.34346						ZSCAN10	1.40016
HECTD3	2.26439						ANP32E	1.39995
BEND5	1.69016						GFRA3	1.39986
PARP8	1.49397						IFITM2	1.39959
OGFOD2	1.42809						ITGA7	1.3988
GAL3ST4	2.89395						SKAP2	1.39876
E2F8	1.42213						ABR	1.39797
ZNF668	1.30803						URGCP	1.39773
ZFHX4	1.42807						PARS2	1.39772
IQCA1	1.80805						ZNF865	1.39693
ZNF408	1.7261						OR4S2	1.3969
CARF	1.5372						RTL6	1.3969
NAA40	1.62498						LRP10	1.39684
AGBL2	8.97359						HBQ1	1.39604
TM4SF20	1.50199						IL32	1.39597
SNX22	2.24999						NAA38	1.39572
TREML2	3.40195						MVD	1.39563
ZC3H14	1.6878						ZNF581	1.39533
RIN3	1.49978						VCP	1.39517
ATP8B4	2.50752						PLA2G3	1.39502
DOK3	2.06082						TMEM150A	1.39486
CNTNAP3	1.82792						RCAN1	1.39427
PDZD7	1.65037						NSF	1.39421
DNAJB14	1.76188						PTPRJ	1.39384
NRSN2	1.35118						CTDSPL	1.39322
FBXL18	2.37252						DYNC1I2	1.39318
ADAMTS20	1.96413						GLI1	1.39237
CCDC15	1.82635						SYNGR2	1.39186
PROSER1	1.43993						TMA16	1.39137
ARMC9	1.46693						PSMC3	1.39111
ZNF430	1.97737						PELATON	1.39089
HSD3B7	1.63384						GALNT14	1.3901
AKNA	1.45354						B3GAT2	1.3901
VWA7	1.44969						RNF170	1.39009
C6orf25	1.40302						KCNK10	1.3898
LY6G6C	1.44624						TRMU	1.38933
LY6G5C	2.60152						TOR1B	1.38927
THUMPD2	1.89418						TMEM88	1.3886
TMEM121	2.88389						INHBC	1.38833
DDHD1	1.34039						CELF2	1.38811
APOL6	1.33143						POLR2M	1.38766
PRRT1	3.05706						STK24	1.38743
EGFL8	2.94631						ANKRD18A	1.38734
OR2AE1	2.65866						SPINK14	1.38712
OR6N2	1.40508						POM121L2	1.38689
OR2L5	1.71847						DLEC1	1.3868
SYNC	2.12311						XPO5	1.38635
CFHR5	1.89069						CTRB1	1.38581
VOPP1	1.44317						COX7A2L	1.3854
CCDC130	1.47916						CNIH4	1.38533
SNX27	1.45359						PCDHA1	1.38532
TMEM163	2.11916						DCTPP1	1.38527
TSPAN14	3.72728						INTS6	1.38513
TSC22D4	2.61388						ADH1B	1.3836
OR2B2	2.02314						FAIM2	1.38307
PPP1R14C	1.65076						PCDHA3	1.38262
TRIM7	1.58208						CYTL1	1.38033
SPACA1	1.49826						GDPD4	1.38001
TRIM56	1.4318						TMEM114	1.37997
ISG20L2	1.48282						CCNO	1.37885
DRC3	1.44755						PCDHA2	1.37865
APH1B	1.65857						VPS26B	1.37827
C11orf68	1.61208						HBA1	1.37826
RPS6KL1	3.70268						TTC39B	1.3782
SLC4A9	3.41614						GRINA	1.37807
CRISPLD2	1.32035						CTDNEP1	1.37771
FAM57B	2.21717						RIMS3	1.37721
ZNF484	1.61147						PCDHA4	1.37663
L3MBTL2	1.93233						NR4A3	1.37652
ANGPTL6	1.66109						CD63	1.37619
FSD1L	2.18529						HOXA6	1.37582
TATDN1	1.52717						AIPL1	1.37454
TSSK1B	1.80269						PTBP2	1.37388
MND1	1.68096						NDUFB2	1.37382
NSRP1	1.56716						C6orf58	1.37363
ZNF394	1.58066						SLC30A7	1.37351
ATRIP	1.33535						KLHL25	1.37313
FAM161A	1.49321						LIPK	1.37282
KAT8	1.41079						DOK5	1.37223
ANTXR1	1.77111						METTL18	1.37164
FAM96A	2.38788						BTBD16	1.37131
TMEM117	2.02297						ACP7	1.37106
WDR24	1.59179						SCNN1A	1.37094
MRI1	1.44977						RAB11B	1.37077
SGIP1	1.3966						ARHGAP27	1.37068
PSMG3	1.62129						GTF2H2C	1.37041
RPAIN	2.24341						RCAN2	1.36999
MRPL45	1.84397						KIT	1.36956
BRMS1L	1.85745						ADORA3	1.36857
MCRIP2	1.35088						PRIMA1	1.36842
DYDC2	1.65328						LRCH1	1.36761
COA8	1.75506						MB	1.36718
CYSTM1	3.38541						C7orf77	1.3667
LZTS2	1.44256						METTL4	1.36621
SYVN1	1.86883						SAMM50	1.36573
SLX4	2.06124						GUCY1B1	1.36562
ACRBP	2.22708						NXPH2	1.36488
HOPX	1.78502						LOC101928548	1.36465
MRPL43	1.7694						SCNN1G	1.36437
COL25A1	2.9495						STK40	1.3641
ZNF594	1.3027						CLEC1A	1.36358
NTNG2	1.4085						KCTD14	1.36275
GLYR1	1.63933						SLC19A3	1.36241
TRIM55	1.70097						DRG1	1.36237
INSM2	1.35899						SMPD5	1.3621
NAA11	1.64396						RBCK1	1.36196
FAM220A	2.4002						GRAMD4	1.36182
BUD13	1.37665						OPTN	1.36105
ADTRP	1.36975						STRIP1	1.36014
RAX2	1.32233						WDR20	1.35941
AGBL4	1.35503						STX17	1.35925
MFSD2A	3.64401						FAM171A2	1.35912
SPPL2A	3.7783						RAX2	1.35888
FAM222A	1.67634						INPP5E	1.35864
ALG10	1.59657						IL22	1.35863
CORO6	1.53645						GABARAP	1.35838
TIGD5	1.35811						ERBB3	1.35798
C1orf94	2.17047						FBXW7	1.35711
MFSD5	1.85677						HBS1L	1.3568
CFAP300	1.68806						PRR35	1.35581
TMEM60	1.32967						LRRC14B	1.35539
TRIM5	2.71847						PABPC1	1.35539
KIAA1671	2.45942						UBE3D	1.3546
DNAJC14	1.34308						CYP26A1	1.35433
SLC45A3	1.75041						RRAGC	1.35425
TRIM4	2.6252						SRPK1	1.35379
MVB12B	1.7034						PLLP	1.35373
RHOT2	1.7607						POLM	1.35344
UBE3D	3.10339						TRABD	1.35268
WFDC8	1.34447						ATP13A2	1.35263
UCN2	2.02805						GPLD1	1.35043
OTULIN	3.70019						LRRC37A	1.35043
EFCAB12	2.07664						PILRB	1.35012
TP53I13	2.18912						BTNL8	1.34975
THAP3	2.08169						DENND2C	1.34941
ZNF160	1.49398						MAPKAPK5	1.34891
ZNF622	1.37129						USP17L11	1.34886
C19orf52	1.30357						UGCG	1.34885
SPOCD1	1.30711						KCNS3	1.34857
CCDC149	1.64772						GCOM1	1.34714
GGTLC2	1.45571						TPD52L3	1.34712
SLC39A13	11.8412						CD2	1.34657
TMEM259	6.81796						ABHD14A	1.34588
ANKRD40	2.05097						ZNF843	1.34523
ZNF502	3.05307						SIGLEC12	1.34522
BTF3L4	1.54058						HHLA1	1.34512
COL23A1	1.84327						FBLN5	1.34454
PCED1B	2.41007						IGLL5	1.34453
C12orf65	1.69195						FBLN7	1.34452
ZNF830	1.96003						OR1L3	1.34433
ATPAF2	1.81107						ENTPD4	1.34401
YTHDC1	1.97593						RAD54L2	1.34353
CALML4	1.36058						CHTF8	1.34342
MARVELD3	1.46763						C1orf56	1.34315
ZC3HAV1L	2.43989						METTL7B	1.34315
TTC30A	2.08421						CDC37	1.34269
INTS4	1.64512						ACOX1	1.34259
MTDH	2.32918						SDR9C7	1.34228
MTSS1L	4.95833						FHIT	1.34214
BBIP1	2.36554						APEH	1.34107
FAM114A1	1.69553						PLEKHH2	1.34103
TMEM169	2.09606						NA	1.3406
REEP6	1.65302						LMBRD1	1.34025
ORAI3	1.81147						SEPTIN1	1.34006
TBCK	1.38152						PANX2	1.33993
GNG8	1.90904						RPL7L1	1.33923
TP53INP1	3.38738						NUP210	1.33887
CMTM7	2.64743						GRM2	1.33848
STX1B	1.60098						SAXO1	1.33741
CDCA5	2.67199						UBASH3B	1.33729
KIF12	1.45557						KRAS	1.33718
C12orf57	1.39627						MAF	1.33704
ZBED6CL	1.30579						NRDC	1.33616
SLC35A4	1.68744						MOSMO	1.33612
BTBD9	1.55371						TOP1MT	1.33593
CSMD2	1.73288						USP17L12	1.3353
KLHL29	1.48447						USP17L13	1.3353
RHPN1	1.31095						CYBA	1.33508
OSBPL1A	1.3412						PPP1R7	1.33484
C1QTNF4	8.60947						SERPINE3	1.33439
FBXO32	1.86274						FAM78B	1.33317
SMIM19	2.66416						PILRA	1.33304
PTPMT1	8.25591						RSPH10B	1.33269
SLC26A9	2.34408						LPAR3	1.33162
FCRL1	1.89609						FBXO6	1.33127
GBP5	2.36379						ETF1	1.33095
ZNF501	2.87504						PCBP3	1.33081
TRMT61A	2.24069						ZKSCAN3	1.33074
LRRC58	2.14437						ARL17B	1.32722
ABHD15	1.98176						DUSP1	1.32697
ACSM1	1.88756						MYLPF	1.32695
GRIN3B	4.21405						NA	1.32682
TOP1MT	1.58201						GPR20	1.32678
MAS1L	1.36871						UBE2E3	1.32637
APOA5	2.54946						RAB1B	1.32594
MRPL54	1.3193						TICRR	1.32574
SLC18B1	1.30622						OLFM2	1.32563
MED12L	1.98401						YPEL3	1.32504
RFFL	1.853						CHRM3	1.3246
ANTXR2	1.5824						C1orf112	1.32383
MUCL1	1.831						ST6GALNAC6	1.32355
BTBD16	1.37957						GMPS	1.32254
COLCA2	2.82327						EHD4	1.32236
LRIG3	1.6993						NHLRC4	1.32232
TPH2	1.63999						DEFB135	1.32174
NEDD1	1.88894						PDZD8	1.32124
BTBD11	1.34556						PLPPR2	1.32095
ALKBH2	1.56846						PRLHR	1.32084
CLBA1	1.30256						DROSHA	1.3205
KLHDC1	2.4156						UNC13D	1.32049
TTC8	2.82962						PRCC	1.32044
TC2N	2.40137						LOC441098	1.31976
SLC24A4	7.7742						VAMP8	1.3197
ACSM2A	2.69255						BTN1A1	1.31935
IQCK	6.04175						OR8U1	1.31923
SEPTIN12	1.7406						BCAR1	1.31865
HSF5	1.79934						SKA2	1.31832
TMEM132E	1.50325						KCTD21	1.31806
ANKRD13B	2.18408						GOLGA6L19	1.31762
ZFP3	1.5646						IQCH	1.31687
EFCAB13	2.78039						TRPS1	1.31683
ZNF816	1.5889						FUCA1	1.31668
NLRP13	2.26334						LRRC52	1.31657
NLRP8	1.55911						SUCLA2	1.31649
ZNF787	1.62705						PTPN4	1.31632
LRRC25	3.67213						COQ2	1.31605
RINL	1.48804						H2AC1	1.3159
OR2M5	1.76153						KDM7A	1.31589
MYOM3	2.35421						VTI1A	1.31572
DMBX1	1.51882						HJV	1.31565
UBXN10	1.75154						TRIM13	1.31499
GOLT1A	1.49224						H2BC1	1.31495
OR10T2	1.51087						INSRR	1.31469
OR10Z1	1.52369						ANGEL1	1.31446
OR6K6	1.67948						LRFN1	1.31434
OR6N1	1.425						FBN1	1.31409
TSHZ2	1.91923						USP39	1.3137
TYW5	2.72004						PRR34	1.3136
DIS3L2	2.3023						PARP10	1.31324
ACMSD	2.94854						C11orf40	1.3132
ICA1L	1.6986						HCFC2	1.31277
CLHC1	1.34155						GLOD4	1.31254
UBR3	1.31052						TAS2R7	1.31119
TMEM42	2.58885						C6orf226	1.31073
TAMM41	1.34322						GDNF-AS1	1.3105
H1-8	1.61023						HAUS6	1.30942
TMPRSS11B	4.69527						ILDR2	1.30933
SLCO6A1	1.75291						ZCCHC3	1.30917
WDR36	1.66981						ZNF280A	1.30914
NDUFAF6	2.3833						SLC17A4	1.30895
LYPD2	1.94892						ELP5	1.30894
TCP10L	1.71271						GMFB	1.30852
ZBTB46	1.78693						ZNF445	1.30825
ABHD16B	2.19002						SRP14	1.30809
TMEM37	2.18222						RGPD6	1.30778
ADAMTS14	1.37749						RASGRF1	1.30771
SRXN1	1.72644						ADAP2	1.30656
CST11	1.37639						RAB3D	1.30646
STK35	1.35236						MTAP	1.30604
DYDC1	1.84872						SULF1	1.30517
C11orf94	2.2533						CUX2	1.30511
FAM76B	3.14958						EIF4G3	1.30501
LAYN	1.84091						VENTX	1.30485
ALG10B	1.85239						ARMC5	1.30449
HNRNPA1L2	2.86931						MT1HL1	1.3042
PPP1R36	1.84076						FMN1	1.3042
TTC7B	1.32214						SEC16A	1.30411
C16orf92	1.83171						OR6F1	1.30285
IL34	2.89137						TBC1D5	1.30276
PRSS36	1.48658						FAM135B	1.30274
TOM1L2	1.44648						RPS23	1.30264
EFCAB3	1.53979						CC2D2A	1.30209
SLC35G3	1.47404						MTUS2	1.30209
TMC8	1.67291						OR51F1	1.30135
VSIG10L	1.57684						OR5B3	1.30126
ERVV-1	1.33352
ZNF548	1.39735
DACT3	2.24282
ZNF714	1.77268
PHF13	1.9742
KNCN	1.8331
BTBD19	2.3176
RIMBP3C	3.69799
YDJC	3.41963
CHADL	1.96369
TTC30B	1.76424
KANSL1L	3.17576
GPR155	2.00748
ZNF595	2.35224
DAB2IP	1.35874
ZMAT2	1.89994
FAM81B	1.80738
CCDC112	3.18361
RNF145	1.42185
SLC2A12	2.6644
RUNDC3B	2.03163
BMT2	3.31945
CLEC2L	2.24555
SLC2A7	1.63986
CLEC12A	2.01623
EML5	2.34099
FSIP1	1.81841
C16orf82	1.3717
MARCHF10	1.33387
MFSD6L	1.36523
SLFN5	1.47084
RHBDL3	1.55546
SPPL2C	1.53653
ZNF564	1.36857
GBP6	1.36231
LEXM	1.91126
KANK4	1.55083
HFM1	2.11474
CCDC116	3.34467
DCLK2	2.40812
SGMS2	1.64438
ZNF800	2.55893
COL22A1	1.46963
ZNF596	2.14794
SSBP4	5.0933
ZNF384	2.38426
ADAMTS19	2.07414
ANO6	1.67496
ARID2	1.53499
FAM227B	1.78275
WDR90	1.65421
NLRC3	2.06942
CYP4Z1	1.99701
C1orf100	1.58478
TEX37	1.65898
SPRED2	3.06713
ALG1L	1.37107
TVP23C	1.58473
LYRM9	1.35668
SLC10A4	1.57794
STK32A	1.58808
TMEM184A	2.32888
ERICH5	1.53946
C2orf69	2.47121
SENP5	1.39644
TRIML2	1.38437
LVRN	1.42059
OR8K5	1.52571
OR5T2	1.47808
OR8H1	1.58561
OR8K3	1.59628
OR8J1	1.31087
OR5R1	1.61852
OR5M8	1.42953
OR5AR1	1.66186
ARMC3	2.87063
TYSND1	1.33882
CCNY	1.65333
TBATA	1.4064
OR8G5	1.31702
OR6Q1	1.40431
OR5B21	1.99727
OOSP2	6.65677
MS4A15	1.33829
CCDC83	4.42552
HEPACAM	1.55035
ZNF438	1.95865
OPN5	2.99251
ADGRF4	2.70154
OARD1	7.65928
ZBTB12	2.11485
ZSCAN25	1.586
FAM200A	2.54444
PPP1R35	1.90118
GPC2	2.94393
DAGLB	1.47676
ADGRF2	3.44846
TSPO2	1.90661
UNC5CL	1.94608
NYAP1	2.66268
SLC29A4	1.82719
MS4A6E	14.3305
CNPY4	2.8717
CDC26	1.68004
LACE1	1.38778
IPMK	3.9439
GPATCH11	1.53117
NAALADL2	1.3132
MBLAC1	2.69334
RASGEF1C	1.47437
PCSK9	3.10827
INAFM1	2.05222
ANKRD31	1.84814
OR4C3	1.32178
ST6GALNAC3	1.70919
TCERG1L	1.42591
RNF214	1.53167
FAM133B	2.03365
NCR3	1.84388
LY6G6F	2.1488
WFDC11	1.35354
ASPM	2.22406
TAS2R41	2.64382
FDCSP	1.31106
TIPRL	1.31527
BEST4	2.02802
RBM20	1.42156
OR4C13	1.31407
OR4C12	1.33059
TRIM49B	3.55317
BCL9L	1.34278
OR9G4	1.38537
RCOR2	2.18491
SPRYD4	1.8363
SIAH3	1.79067
PROX2	4.18818
TEDC1	2.2822
SAXO2	3.32952
INO80E	1.46377
HID1	1.39254
C17orf58	1.99745
CDRT4	1.78005
KANSL1	1.61608
FAM171A2	1.79926
C17orf47	2.55738
METRNL	2.09165
SIGLEC15	2.5413
LYPD5	1.42613
ZNF283	1.56988
TPRX1	1.53747
SIGLECL1	3.82053
RIIAD1	1.3011
OR2L13	3.13343
CYP4A22	1.5345
ALKAL2	2.25206
IGSF10	1.88104
CCDC66	1.75587
TCAIM	2.54328
ZNF852	4.07083
ZNF660	3.87247
FRYL	1.46536
STPG2	1.31909
OR2V2	2.08471
C5orf64	1.36022
TREML4	2.36509
ZNF789	1.43843
LSMEM1	1.68931
ZNF707	1.68403
DPY19L4	1.35957
ZAR1	1.69056
IFNE	1.74865
TAS2R60	5.82243
HCAR2	1.89181
OR5AP2	1.71974
OR2AG2	1.91732
JMJD8	1.70086
METTL2A	1.57571
ADAMTSL5	1.423
CCDC158	2.37844
TMPRSS11A	3.1392
LRRC66	1.48269
TREML1	7.38643
ZNF680	1.43167
RSPO2	3.11181
C11orf53	2.48532
NBPF7	2.61717
TCTEX1D4	2.4899
GPR149	1.67471
SOWAHB	1.59566
OR2A1	1.86249
GNAT3	1.5233
TUBB2B	1.87212
AMIGO2	1.66266
ACSM2B	2.15026
CLEC18A	2.09689
SKA2	2.80033
GJC3	2.71935
RTN4RL2	2.20161
CASTOR3	2.46984
PADI6	1.54083
ZNF445	3.56244
KRTAP12-2	1.92804
SPATA12	1.32522
KRTAP12-1	1.92529
KRTAP10-10	1.51228
GPR141	2.96593
TICAM2	2.20379
LILRA5	1.65859
ZBTB41	2.42397
USP50	3.7317
DND1	1.88147
GALNT18	1.66867
TMEM179B	1.96493
ZNF710	1.46908
EFCAB5	1.41351
IGFL1	2.89039
PFN4	1.9495
FAM228B	1.58436
TOPAZ1	1.78537
USP17L2	1.39587
KCTD4	1.59777
KRTAP10-11	1.84845
KRTAP12-3	1.8727
KRTAP12-4	1.82463
KRTAP10-12	1.6447
KRTAP5-10	1.43409
TBPL2	2.40606
THEMIS	1.31105
FAM21A	1.34673
SH2D4B	3.23374
ARMS2	2.26982
CLEC2A	1.89446
C1QTNF9B	2.77101
CCDC9B	1.34325
SCIMP	2.67278
C4orf50	1.79388
TMPRSS11F	3.3838
ARHGEF37	1.84695
GLYATL3	1.73547
CCDC162P	1.44973
LAMTOR4	2.62644
XKR9	3.46902
OR52D1	1.73667
OR5T3	1.5795
OR9G1	1.51783
OR10V1	1.53802
OR10G7	1.94896
ACP7	1.93825
ERFL	1.45073
PLA2G2C	2.32071
OR10K2	2.37481
OR2AK2	2.03161
OR2L3	2.70659
SULT6B1	1.8825
USP17L7	1.39587
SHC4	2.74038
FAM180B	8.69629
COLCA1	2.88353
C11orf88	1.33159
SNX19	2.663
KNOP1	5.18274
C17orf97	1.34675
C1orf141	1.83905
FAM177B	1.37002
EML6	2.5744
FSIP2	4.98957
FOXL2NB	1.32945
PRR27	1.36774
MCCD1	1.38238
SAPCD1	1.45184
OR5K2	1.30853
KPNA7	1.90721
C7orf61	2.3445
IGLON5	1.48641
IFITM10	1.44281
OR4A47	2.42003
ANKHD1-EIF4EBP3	2.11891
TAFA1	2.22616
KRTAP5-6	1.58236
SMIM22	1.89702
CTRB2	1.83565
GPR179	2.15493
OOEP	1.30657
SPDYE3	1.94638
OR4F21	1.73488
PTCHD4	1.4416
LRRC37A2	1.37511
IGIP	2.09382
FBXO47	2.04037
PJVK	2.67058
DPRX	1.33053
PCOTH	2.75746
PEF1	2.38324
RAD21L1	1.40759
LIPN	1.35144
MS4A4E	18.1032
GOLGA6L4	2.43176
NKX2-4	1.43666
ALG1L2	1.48061
TMEM14EP	1.99114
CBY3	1.77953
C4orf51	1.32526
TRIM64C	3.31268
TEX22	4.14085
GPR89A	1.73748
PPAN-P2RY11	1.71041
MUC5B	2.17295
NUTM2A	1.97428
DEFA1B	2.29659
NPIPB11	1.45843
ZNF736	1.56084
AGAP5	1.37032
MORN2	1.41355
SIGLEC14	1.66093
MINAR2	3.06389
C8orf88	2.55517
MUC8	2.28969
ZNF730	1.74475
C17orf107	3.54904
TMEM262	2.59612
TBC1D7	1.98818
SP9	1.3316
GOLGA6L3	1.93397
C17orf99	1.7204
ERVV-2	1.61696
TMED7-TICAM2	2.42266
SAP25	1.65811
INAFM2	1.90619
UBE2Q2L	1.54766
ARL17B	1.7318
THEGL	1.76485
DCDC1	1.49883
MRLN	1.57034
GIMD1	2.02899
ATP5J2-PTCD1	1.84664
TVP23C-CDRT4	1.81639
LDB3	1.6438
APOE	50

## Sheet: GO Nucleus list
GO "Nucleus" Gene/Protein List N=7639
Uniprot ID	Symbol from GO
A0A024RBG1	NUDT4B
A0A087WUV0	A0A087WUV0
A0A087WVE0	A0A087WVE0
A0A087WWC5	A0A087WWC5
A0A087WX78	ELOA3CP
A0A087X0R7	SENP3-EIF4A1
A0A096LPK6	A0A096LPK6
A0A0B4J1W7	NPIPA9
A0A0B4J2E5	LOC102724159
A0A0C4DFX4	A0A0C4DFX4
A0A0C5B5G6	MT-RNR1
A0A0D9SG24	A0A0D9SG24
A0A0G2JNQ3	HNRNPCL2
A0A0G2JPF8	HNRNPCL4
A0A0G2JS52	A0A0G2JS52
A0A0J9YX57	MAGEB6B
A0A0J9YYC4	A0A0J9YYC4
A0A0U1RQI7	KLF18
A0A0U1RQV5	A0A0U1RQV5
A0A1B0GTH6	CSNKA2IP
A0A1B0GTS1	HSFX4
A0A1B0GUS4	UBE2L5
A0A1B0GVI7	A0A1B0GVI7
A0A1B0GVX0	LITAFD
A0A1B0GW55
A0A1B0GWH4	HSFX3
A0A1W2PP81	TAF11L7
A0A1W2PPD8	KDM4F
A0A1W2PPE2	TAF11L4
A0A1W2PPF3	DUXB
A0A1W2PPH5	TAF11L13
A0A1W2PPK0
A0A1W2PPL8	TAF11L14
A0A1W2PPM1	CPHXL
A0A1W2PPW3	TAF11L12
A0A1W2PQ09	TAF11L11
A0A1W2PQ27	SSU72P7
A0A1W2PQ64	SSU72P5
A0A1W2PQ73	ERFL
A0A1W2PQC6	SSU72P4
A0A1W2PQD8	SSU72P2
A0A1W2PQJ5	SSU72P3
A0A1W2PR48	TLE7
A0A1W2PR64	TAF11L9
A0A1W2PR75	SSU72P8
A0A1W2PRN6	LINC02218
A0A1W2PRP0	FOXL3
A0A1W2PRV1	TAF11L3
A0A2R8Y422	RPS27AP5
A0A2R8Y4L2	HNRNPA1P48
A0A2R8Y619	H2BE1
A0A2R8YD15	A0A2R8YD15
A0A2R8YFR7	A0A2R8YFR7
A0A2U3TZJ3	A0A2U3TZJ3
A0A3B3IU46	RAMACL
A0A3B3IU63	H2AL3
A0A494C1R9	TSPY9P
A0A5F9ZHS7	NFILZ
A0A7P0Z4L6	LOC100133315
A0AUZ9	KANSL1L
A0AV96	RBM47
A0AVK6	E2F8
A0AVT1	UBA6
A0JLT2	MED19
A0PJX2	TLDC2
A0PJY2	FEZF1
A0PK00	TMEM120B
A1A519	FAM170A
A1E959	ODAM
A1L020	MEX3A
A1L167	UBE2QL1
A1L190	SYCE3
A1L3X4	MT1DP
A1L4K1	FSD2
A1XBS5	FAM92A
A1YPR0	ZBTB7C
A1Z1Q3	MACROD2
A2A288	ZC3H12D
A2A368	MAGEB16
A2A3K4	PTPDC1
A2AJT9	BCLAF3
A2PYH4	HFM1
A2RRD8	ZNF320
A2RRH5	WDR27
A2RTX5	TARS3
A2RU30	TESPA1
A2RU54	HMX2
A2RUB1	MEIOC
A2RUT3	TMEM89
A3KN83	SBNO1
A4D1E1	ZNF804B
A4D1E9	GTPBP10
A4D1T9	PRSS37
A4D256	CDC14C
A4D2B0	MBLAC1
A4D2B8	PMS2P1
A4FU49	SH3D21
A5LHX3	PSMB11
A5PLL1	ANKRD34B
A5YKK6	CNOT1
A6H8Y1	BDP1
A6NC97	FAM172BP
A6NCF6	MAGEA13P
A6NCL1	GMNC
A6NCS4	NKX2-6
A6NCW0	USP17L3
A6NCW7	USP17L4
A6ND36	FAM83G
A6NDE4	RBMY1B
A6NDR6	MEIS3P1
A6NDU8	C5orf51
A6NDV4	TMEM8B
A6NDX5	ZNF840P
A6NEQ0	RBMY1E
A6NF01	POM121B
A6NF83	NUPR2
A6NFD8	HELT
A6NFF2	NAP1L6P
A6NFH5	FABP12
A6NFI3	ZNF316
A6NFN3	RBFOX3
A6NFQ7	DPRX
A6NFY4	NEMP2
A6NGD5	ZSCAN5C
A6NGH8	ANKRD61
A6NGQ2	OOEP
A6NGY1	FRG2C
A6NHJ4	ZNF860
A6NHN6	NPIPB15
A6NHQ2	FBLL1
A6NHR9	SMCHD1
A6NHT5	HMX3
A6NI15	MSGN1
A6NI79	CCDC69
A6NIE6	RRN3P2
A6NIR3	AGAP5
A6NIX2	WTIP
A6NJ46	NKX6-3
A6NJ64	NPIPB2
A6NJ88	SAGE2P
A6NJB7	PRR19
A6NJG6	ARGFX
A6NJL1	ZSCAN5B
A6NJT0	UNCX
A6NJU9	NPIPB13
A6NJV1	FAM166C
A6NJZ7	RIMBP3C
A6NK53	ZNF233
A6NK75	ZNF98
A6NKD2	TSPY2
A6NKF1	SAC3D1
A6NKF2	ARID3C
A6NKT7	RGPD3
A6NLC8	A6NLC8
A6NLF2	ELOA3DP
A6NLJ0	C2CD4B
A6NLU0	RFPL4A
A6NLW8	DUXA
A6NM28	ZFP92
A6NMK7	CPSF4L
A6NMT0	DBX1
A6NMY6	ANXA2P2
A6NN14	ZNF729
A6NNA5	DRGX
A6NNF4	ZNF726
A6NNM3	RIMBP3B
A6NNY8	USP27X
A6NP11	ZNF716
A7KAX9	ARHGAP32
A7MD48	SRRM4
A7XYQ1	SOBP
A8CG34	POM121C
A8K0S8	MEIS3P2
A8K8V0	ZNF785
A8MPP1	DDX11L8
A8MQ11	PMS2P5
A8MQ14	ZNF850
A8MRT5	NPIPB5
A8MT33	SYCE1L
A8MT65	ZNF891
A8MT69	CENPX
A8MTJ6	FOXI3
A8MTL3	RNF212B
A8MTQ0	NOTO
A8MTY0	ZNF724
A8MU46	SMTNL1
A8MUK1	USP17L5
A8MUU1	FABP5P3
A8MUV8	ZNF727
A8MUZ8	ZNF705G
A8MV65	VGLL3
A8MVJ9
A8MVS1	ZNF705F
A8MVW5	HEPACAM2
A8MW92	PHF20L1
A8MW99	MEI4
A8MWA4	ZNF705E
A8MWD9	SNRPGP15
A8MXQ7	IQANK1
A8MXT2	MAGEB17
A8MXY4	ZNF99
A8MYZ6	FOXO6
A8MZ59	LEUTX
A9QM74	KPNA7
A9UHW6	MIF4GD
A9YTQ3	AHRR
B0I1T2	MYO1G
B1AK76	SNURFL
B1ANY3	FAM220BP
B1APH4	ZNF487
B2CW77	KLLN
B2RD01	CENPBD1P
B2RPK0	HMGB1P1
B2RXF5	ZBTB42
B2RXH2	KDM4E
B2RXH4	BTBD18
B2RXH8	HNRNPCL2
B3EWF7	EPM2A
B4DU55	ZNF879
B4DX44	ZNF736
B4DXR9	ZNF732
B7Z6K7	ZNF814
B7ZW38	HNRNPCL3
C9IYD2	NPIPB12
C9J2P7	USP17L15
C9JCN9	HSBP1L1
C9JE40	PATL2
C9JG80	NPIPB4
C9JJH3	USP17L10
C9JLJ4	USP17L13
C9JLW8	MCRIP1
C9JN71	ZNF878
C9JPN9	USP17L12
C9JSJ3	MEIOSIN
C9JVI0	USP17L11
D3DTV9	PRAC2
D6R901	USP17L21
D6R9N7	USP17L18
D6RA61	USP17L22
D6RBM5	USP17L23
D6RBQ6	USP17L17
D6RCP7	USP17L19
D6RGH6	MCIDAS
D6RJB6	USP17L20
E5RHQ5	NPIPB11
E5RI56	E5RI56
E7ETH6	ZNF587B
E7EW31	PROB1
E9PAV3	NACA
E9PB15	PTGES3L
E9PGG2	ANHX
E9PIF3	NPIPA2
E9PJ23	NPIPB6
E9PJI5	NPIPA7
E9PKD4	NPIPA5
E9PQR5	NPIPB8
F8VRH5	F8VRH5
F8VTS6	RFPL4AL1
F8W0I5	NPIPB12
F8W1W9	NPIPB9
F8WFD2	NPIPA3
G2XKQ0	SUMO1P1
H0Y9P7	H0Y9P7
H0YGN5	H0YGN5
H0YGX0	H0YGX0
H0YIQ5	NPIPB12
H0YIS7	RNASEK-C17orf49
H0YL14	TMEM250
H3BTX0	H3BTX0
H7C0I5	H7C0I5
I0J062	PANO1
I3L521	I3L521
J3QL48	J3QL48
J3QRK9	J3QRK9
J3QT63	J3QT63
K7EN84	K7EN84
K7EQG2	K7EQG2
M0QXG2	M0QXG2
M0QY20	M0QY20
M0QYV0	M0QYV0
M0R076	M0R076
M0R135	M0R135
M0R2N6	M0R2N6
M0R3G1	M0R3G1
M0R3H8	M0R3H8
O00110	OVOL3
O00116	AGPS
O00124	UBXN8
O00139	KIF2A
O00141	SGK1
O00148	DDX39A
O00154	ACOT7
O00159	MYO1C
O00161	SNAP23
O00165	HAX1
O00167	EYA2
O00170	AIP
O00182	LGALS9
O00192	ARVCF
O00204	SULT2B1
O00213	APBB1
O00219	HAS3
O00221	NFKBIE
O00230	CORT
O00231	PSMD11
O00232	PSMD12
O00233	PSMD9
O00255	MEN1
O00257	CBX4
O00258	GET1
O00267	SUPT5H
O00268	TAF4
O00273	DFFA
O00287	RFXAP
O00291	HIP1
O00299	CLIC1
O00308	WWP2
O00311	CDC7
O00321	ETV2
O00327	ARNTL
O00337	SLC28A1
O00358	FOXE1
O00401	WASL
O00408	PDE2A
O00409	FOXN3
O00410	IPO5
O00422	SAP18
O00425	IGF2BP3
O00442	RTCA
O00443	PIK3C2A
O00444	PLK4
O00458	IFRD1
O00459	PIK3R2
O00470	MEIS1
O00472	ELL2
O00479	HMGN4
O00482	NR5A2
O00487	PSMD14
O00488	ZNF593
O00499	BIN1
O00505	KPNA3
O00507	USP9Y
O00512	BCL9
O00534	VWA5A
O00541	PES1
O00555	CACNA1A
O00560	SDCBP
O00566	MPHOSPH10
O00567	NOP56
O00570	SOX1
O00571	DDX3X
O00590	ACKR2
O00592	PODXL
O00625	PIR
O00629	KPNA4
O00635	TRIM38
O00712	NFIB
O00716	E2F3
O00743	PPP6C
O00750	PIK3C2B
O00754	MAN2B1
O00757	FBP2
O00762	UBE2C
O00763	ACACB
O00764	PDXK
O00767	SCD
O14497	ARID1A
O14503	BHLHE40
O14512	SOCS7
O14519	CDK2AP1
O14524	NEMP1
O14526	FCHO1
O14529	CUX2
O14530	TXNDC9
O14548	COX7A2L
O14556	GAPDHS
O14558	HSPB6
O14561	NDUFAB1
O14576	DYNC1I1
O14578	CIT
O14579	COPE
O14593	RFXANK
O14595	CTDSP2
O14599	BPY2
O14604	TMSB4Y
O14607	UTY
O14618	CCS
O14627	CDX4
O14628	ZNF195
O14641	DVL2
O14646	CHD1
O14647	CHD2
O14656	TOR1A
O14657	TOR1B
O14672	ADAM10
O14681	EI24
O14682	ENC1
O14684	PTGES
O14686	KMT2D
O14709	ZNF197
O14713	ITGB1BP1
O14715	RGPD8
O14717	TRDMT1
O14727	APAF1
O14733	MAP2K7
O14737	PDCD5
O14744	PRMT5
O14745	SLC9A3R1
O14746	TERT
O14753	OVOL1
O14757	CHEK1
O14770	MEIS2
O14771	ZNF213
O14775	GNB5
O14776	TCERG1
O14777	NDC80
O14787	TNPO2
O14802	POLR3A
O14813	PHOX2A
O14818	PSMA7
O14829	PPEF1
O14830	PPEF2
O14862	AIM2
O14867	BACH1
O14880	MGST3
O14893	GEMIN2
O14896	IRF6
O14901	KLF11
O14907	TAX1BP3
O14920	IKBKB
O14921	RGS13
O14924	RGS12
O14929	HAT1
O14933	UBE2L6
O14936	CASK
O14948	TFEC
O14965	AURKA
O14972	VPS26C
O14974	PPP1R12A
O14977	AZIN1
O14978	ZNF263
O14979	HNRNPDL
O14980	XPO1
O14981	BTAF1
O15014	ZNF609
O15015	ZNF646
O15016	TRIM66
O15018	PDZD2
O15037	KHNYN
O15042	U2SURP
O15047	SETD1A
O15054	KDM6B
O15055	PER2
O15060	ZBTB39
O15062	ZBTB5
O15069	NACAD
O15078	CEP290
O15084	ANKRD28
O15090	ZNF536
O15091	PRORP
O15105	SMAD7
O15111	CHUK
O15116	LSM1
O15117	FYB1
O15118	NPC1
O15119	TBX3
O15123	ANGPT2
O15131	KPNA5
O15143	ARPC1B
O15144	ARPC2
O15145	ARPC3
O15151	MDM4
O15156	ZBTB7B
O15160	POLR1C
O15162	PLSCR1
O15164	TRIM24
O15169	AXIN1
O15172	PSPHP1
O15173	PGRMC2
O15178	TBXT
O15182	CETN3
O15194	CTDSPL
O15198	SMAD9
O15205	UBD
O15209	ZBTB22
O15213	WDR46
O15226	NKRF
O15230	LAMA5
O15234	CASC3
O15247	CLIC2
O15264	MAPK13
O15265	ATXN7
O15266	SHOX
O15287	FANCG
O15294	OGT
O15296	ALOX15B
O15297	PPM1D
O15304	SIVA1
O15305	PMM2
O15315	RAD51B
O15318	POLR3G
O15347	HMGB3
O15350	TP73
O15353	FOXN1
O15355	PPM1G
O15357	INPPL1
O15360	FANCA
O15370	SOX12
O15379	HDAC3
O15381	NVL
O15391	YY2
O15392	BIRC5
O15393	TMPRSS2
O15394	NCAM2
O15397	IPO8
O15405	TOX3
O15409	FOXP2
O15417	TNRC18
O15427	SLC16A3
O15428	PIN1P1
O15446	POLR1G
O15457	MSH4
O15460	P4HA2
O15479	MAGEB2
O15480	MAGEB3
O15481	MAGEB4
O15499	GSC2
O15504	NUP42
O15511	ARPC5
O15514	POLR2D
O15516	CLOCK
O15520	FGF10
O15522	NKX2-8
O15523	DDX3Y
O15524	SOCS1
O15525	MAFG
O15527	OGG1
O15530	PDPK1
O15534	PER1
O15535	ZSCAN9
O15540	FABP7
O15541	RNF113A
O15547	P2RX6
O15550	KDM6A
O15553	MEFV
O43143	DHX15
O43148	RNMT
O43151	TET3
O43156	TTI1
O43159	RRP8
O43167	ZBTB24
O43172	PRPF4
O43184	ADAM12
O43186	CRX
O43187	IRAK2
O43189	PHF1
O43196	MSH5
O43236	SEPTIN4
O43242	PSMD3
O43248	HOXC11
O43251	RBFOX2
O43255	SIAH2
O43257	ZNHIT1
O43264	ZW10
O43272	PRODH
O43290	SART1
O43293	DAPK3
O43294	TGFB1I1
O43296	ZNF264
O43298	ZBTB43
O43299	AP5Z1
O43301	HSPA12A
O43309	ZSCAN12
O43313	ATMIN
O43316	PAX4
O43318	MAP3K7
O43324	EEF1E1
O43325	LYRM1
O43345	ZNF208
O43347	MSI1
O43361	ZNF749
O43364	HOXA2
O43365	HOXA3
O43379	WDR62
O43390	HNRNPR
O43395	PRPF3
O43396	TXNL1
O43423	ANP32C
O43427	FIBP
O43435	TBX1
O43439	CBFA2T2
O43447	PPIH
O43463	SUV39H1
O43464	HTRA2
O43474	KLF4
O43482	OIP5
O43491	EPB41L2
O43493	TGOLN2
O43502	RAD51C
O43513	MED7
O43520	ATP8B1
O43524	FOXO3
O43541	SMAD6
O43542	XRCC3
O43543	XRCC2
O43561	LAT
O43566	RGS14
O43567	RNF13
O43592	XPOT
O43593	HR
O43597	SPRY2
O43598	DNPH1
O43609	SPRY1
O43615	TIMM44
O43623	SNAI2
O43633	CHMP2A
O43638	FOXS1
O43660	PLRG1
O43663	PRC1
O43665	RGS10
O43670	ZNF207
O43674	NDUFB5
O43679	LDB2
O43680	TCF21
O43681	GET3
O43683	BUB1
O43684	BUB3
O43707	ACTN4
O43709	BUD23
O43711	TLX3
O43715	TRIAP1
O43719	HTATSF1
O43734	TRAF3IP2
O43739	CYTH3
O43741	PRKAB2
O43745	CHP2
O43752	STX6
O43763	TLX2
O43765	SGTA
O43768	ENSA
O43781	DYRK3
O43791	SPOP
O43805	SSNA1
O43809	NUDT21
O43812	DUX1
O43818	RRP9
O43823	AKAP8
O43829	ZBTB14
O43837	IDH3B
O43889	CREB3
O43913	ORC5
O43918	AIRE
O43929	ORC4
O60216	RAD21
O60224	SSX4
O60225	SSX5
O60229	KALRN
O60231	DHX16
O60237	PPP1R12B
O60238	BNIP3L
O60239	SH3BP5
O60244	MED14
O60248	SOX15
O60260	PRKN
O60264	SMARCA5
O60281	ZNF292
O60284	ST18
O60285	NUAK1
O60287	URB1
O60290	ZNF862
O60291	MGRN1
O60292	SIPA1L3
O60293	ZFC3H1
O60304	ZNF500
O60306	AQR
O60313	OPA1
O60315	ZEB2
O60318	MCM3AP
O60331	PIP5K1C
O60336	MAPKBP1
O60341	KDM1A
O60346	PHLPP1
O60356	NUPR1
O60361	NME2P1
O60381	HBP1
O60393	NOBOX
O60422	ONECUT3
O60447	EVI5
O60479	DLX3
O60481	ZIC3
O60502	OGA
O60504	SORBS3
O60506	SYNCRIP
O60508	CDC40
O60518	RANBP6
O60519	CREBL2
O60524	NEMF
O60543	CIDEA
O60548	FOXD2
O60563	CCNT1
O60566	BUB1B
O60583	CCNT2
O60610	DIAPH1
O60635	TSPAN1
O60636	TSPAN2
O60662	KLHL41
O60663	LMX1B
O60669	SLC16A7
O60671	RAD1
O60673	REV3L
O60674	JAK2
O60675	MAFK
O60682	MSC
O60684	KPNA6
O60688	YPEL1
O60701	UGDH
O60711	LPXN
O60716	CTNND1
O60729	CDC14B
O60732	MAGEC1
O60759	CYTIP
O60760	HPGDS
O60762	DPM1
O60763	USO1
O60765	ZNF354A
O60783	MRPS14
O60806	TBX19
O60812	HNRNPCL1
O60814	H2BC12
O60825	PFKFB2
O60826	CCDC22
O60828	PQBP1
O60829	PAGE4
O60832	DKC1
O60841	EIF5B
O60869	EDF1
O60870	KIN
O60879	DIAPH2
O60885	BRD4
O60902	SHOX2
O60907	TBL1X
O60909	B4GALT2
O60921	HUS1
O60927	PPP1R11
O60934	NBN
O60936	NOL3
O60941	DTNB
O60942	RNGTT
O75030	MITF
O75044	SRGAP2
O75052	NOS1AP
O75063	FAM20B
O75064	DENND4B
O75072	FKTN
O75081	CBFA2T3
O75113	N4BP1
O75116	ROCK2
O75121	MFAP3L
O75123	ZNF623
O75131	CPNE3
O75132	ZBED4
O75150	RNF40
O75151	PHF2
O75152	ZC3H11A
O75154	RAB11FIP3
O75155	CAND2
O75161	NPHP4
O75164	KDM4A
O75170	PPP6R2
O75173	ADAMTS4
O75175	CNOT3
O75177	SS18L1
O75179	ANKRD17
O75182	SIN3B
O75190	DNAJB6
O75200	NPIPB7
O75290	ZNF780A
O75293	GADD45B
O75306	NDUFS2
O75312	ZPR1
O75317	USP12
O75319	DUSP11
O75333	TBX10
O75340	PDCD6
O75344	FKBP6
O75346	ZNF253
O75347	TBCA
O75351	VPS4B
O75360	PROP1
O75362	ZNF217
O75364	PITX3
O75365	PTP4A3
O75367	MACROH2A1
O75368	SH3BGRL
O75373	ZNF737
O75376	NCOR1
O75381	PEX14
O75386	TULP3
O75390	CS
O75391	SPAG7
O75398	DEAF1
O75400	PRPF40A
O75410	TACC1
O75417	POLQ
O75419	CDC45
O75427	LRCH4
O75431	MTX2
O75437	ZNF254
O75438	NDUFB1
O75444	MAF
O75446	SAP30
O75448	MED24
O75460	ERN1
O75461	E2F6
O75467	ZNF324
O75469	NR1I2
O75473	LGR5
O75475	PSIP1
O75478	TADA2A
O75486	SUPT3H
O75487	GPC4
O75489	NDUFS3
O75494	SRSF10
O75496	GMNN
O75506	HSBP1
O75525	KHDRBS3
O75526	RBMXL2
O75528	TADA3
O75529	TAF5L
O75530	EED
O75531	BANF1
O75533	SF3B1
O75541	ZNF821
O75554	WBP4
O75563	SKAP2
O75564	JRK
O75569	PRKRA
O75575	CRCP
O75582	RPS6KA5
O75586	MED6
O75592	MYCBP2
O75593	FOXH1
O75600	GCAT
O75602	SPAG6
O75603	GCM2
O75604	USP2
O75607	NPM3
O75608	LYPLA1
O75618	DEDD
O75626	PRDM1
O75638	CTAG2
O75643	SNRNP200
O75665	OFD1
O75676	RPS6KA4
O75677	RFPL1
O75678	RFPL2
O75679	RFPL3
O75683	SURF6
O75688	PPM1B
O75689	ADAP1
O75691	UTP20
O75694	NUP155
O75695	RP2
O75716	STK16
O75717	WDHD1
O75764	TCEA3
O75771	RAD51D
O75781	PALM
O75791	GRAP2
O75792	RNASEH2A
O75817	POP7
O75818	RPP40
O75820	ZNF189
O75821	EIF3G
O75828	CBR3
O75832	PSMD10
O75840	KLF7
O75844	ZMPSTE24
O75884	RBBP9
O75886	STAM2
O75888	TNFSF13
O75909	CCNK
O75912	DGKI
O75920	SERF1A
O75925	PIAS1
O75928	PIAS2
O75934	BCAS2
O75935	DCTN3
O75937	DNAJC8
O75940	SMNDC1
O75943	RAD17
O75952	CABYR
O75956	CDK2AP2
O75969	AKAP3
O75971	SNAPC5
O75995	SASH3
O76003	GLRX3
O76021	RSL1D1
O76027	ANXA9
O76031	CLPX
O76036	NCR1
O76038	SCGN
O76039	CDKL5
O76054	SEC14L2
O76062	TM7SF2
O76064	RNF8
O76075	DFFB
O76076	CCN5
O76081	RGS20
O76083	PDE9A
O76093	FGF18
O77932	DXO
O94761	RECQL4
O94762	RECQL5
O94763	URI1
O94768	STK17B
O94776	MTA2
O94782	USP1
O94805	ACTL6B
O94806	PRKD3
O94811	TPPP
O94818	NOL4
O94829	IPO13
O94842	TOX4
O94850	DDN
O94851	MICAL2
O94864	SUPT7L
O94874	UFL1
O94875	SORBS2
O94880	PHF14
O94888	UBXN7
O94892	ZNF432
O94900	TOX
O94901	SUN1
O94906	PRPF6
O94913	PCF11
O94916	NFAT5
O94921	CDK14
O94941	UBOX5
O94953	KDM4B
O94983	CAMTA2
O94985	CLSTN1
O94986	CEP152
O94992	HEXIM1
O94993	SOX30
O95049	TJP3
O95059	RPP14
O95067	CCNB2
O95069	KCNK2
O95071	UBR5
O95072	REC8
O95073	FSBP
O95076	ALX3
O95084	PRSS23
O95096	NKX2-2
O95104	SCAF4
O95125	ZNF202
O95139	NDUFB6
O95149	SNUPN
O95155	UBE4B
O95159	ZFPL1
O95163	ELP1
O95168	NDUFB4
O95190	OAZ2
O95201	ZNF205
O95218	ZRANB2
O95229	ZWINT
O95231	VENTX
O95232	LUC7L3
O95235	KIF20A
O95238	SPDEF
O95239	KIF4A
O95243	MBD4
O95248	SBF1
O95251	KAT7
O95255	ABCC6
O95257	GADD45G
O95259	KCNH1
O95260	ATE1
O95271	TNKS
O95273	CCNDBP1
O95319	CELF2
O95343	SIX3
O95347	SMC2
O95359	TACC2
O95361	TRIM16
O95365	ZBTB7A
O95373	IPO7
O95376	ARIH2
O95379	TNFAIP8
O95390	GDF11
O95391	SLU7
O95400	CD2BP2
O95402	MED26
O95409	ZIC2
O95411	TIAF1
O95415	BRI3
O95416	SOX14
O95425	SVIL
O95429	BAG4
O95453	PARN
O95456	PSMG1
O95475	SIX6
O95476	CTDNEP1
O95478	NSA2
O95503	CBX6
O95551	TDP2
O95563	MPC2
O95568	METTL18
O95571	ETHE1
O95600	KLF8
O95602	POLR1A
O95619	YEATS4
O95625	ZBTB11
O95628	CNOT4
O95630	STAMBP
O95633	FSTL3
O95639	CPSF4
O95644	NFATC1
O95677	EYA4
O95684	CEP43
O95696	BRD1
O95704	APBB3
O95707	POP4
O95714	HERC2
O95718	ESRRB
O95721	SNAP29
O95744	PMS2P2
O95751	LDOC1
O95757	HSPA4L
O95758	PTBP3
O95760	IL33
O95777	LSM8
O95780	ZNF682
O95785	WIZ
O95789	ZMYM6
O95801	TTC4
O95810	CAVIN2
O95817	BAG3
O95831	AIFM1
O95833	CLIC3
O95835	LATS1
O95858	TSPAN15
O95863	SNAI1
O95866	MPIG6B
O95897	OLFM2
O95905	ECD
O95926	SYF2
O95931	CBX7
O95935	TBX18
O95936	EOMES
O95947	TBX6
O95948	ONECUT2
O95983	MBD3
O95985	TOP3B
O95989	NUDT3
O95990	FAM107A
O95997	PTTG1
O95999	BCL10
O96004	HAND1
O96006	ZBED1
O96007	MOCS2
O96011	PEX11B
O96017	CHEK2
O96019	ACTL6A
O96020	CCNE2
O96028	NSD2
P00325	ADH1B
P00326	ADH1C
P00338	LDHA
P00441	SOD1
P00491	PNP
P00519	ABL1
P00533	EGFR
P00966	ASS1
P00973	OAS1
P01011	SERPINA3
P01040	CSTA
P01100	FOS
P01106	MYC
P01112	HRAS
P01135	TGFA
P01137	TGFB1
P01160	NPPA
P01258	CALCA
P02489	CRYAA
P02511	CRYAB
P02533	KRT14
P02538	KRT6A
P02545	LMNA
P02649	APOE
P02686	MBP
P02689	PMP2
P02724	GYPA
P02743	APCS
P02768	ALB
P02786	TFRC
P02788	LTF
P02794	FTH1
P02795	MT2A
P03372	ESR1
P03950	ANG
P04049	RAF1
P04053	DNTT
P04075	ALDOA
P04080	CSTB
P04083	ANXA1
P04150	NR3C1
P04156	PRNP
P04181	OAT
P04198	MYCN
P04233	CD74
P04264	KRT1
P04271	S100B
P04279	SEMG1
P04350	TUBB4A
P04406	GAPDH
P04553	PRM1
P04554	PRM2
P04626	ERBB2
P04637	TP53
P04731	MT1A
P04732	MT1E
P04733	MT1F
P04792	HSPB1
P04818	TYMS
P04839	CYBB
P04844	RPN2
P04899	GNAI2
P04908	H2AC4
P05067	APP
P05089	ARG1
P05106	ITGB3
P05109	S100A8
P05114	HMGN1
P05129	PRKCG
P05141	SLC25A5
P05161	ISG15
P05164	MPO
P05198	EIF2S1
P05204	HMGN2
P05230	FGF1
P05388	RPLP0
P05408	SCG5
P05412	JUN
P05413	FABP3
P05423	POLR3D
P05452	CLEC3B
P05455	SSB
P05549	TFAP2A
P05771	PRKCB
P05783	KRT18
P05787	KRT8
P05813	CRYBA1
P05937	CALB1
P05981	HPN
P06132	UROD
P06213	INSR
P06241	FYN
P06276	BCHE
P06396	GSN
P06400	RB1
P06401	PGR
P06454	PTMA
P06493	CDK1
P06576	ATP5F1B
P06702	S100A9
P06703	S100A6
P06730	EIF4E
P06733	ENO1
P06744	GPI
P06746	POLB
P06748	NPM1
P06870	KLK1
P06899	H2BC11
P07101	TH
P07148	FABP1
P07199	CENPB
P07203	GPX1
P07205	PGK2
P07288	KLK3
P07305	H1-0
P07315	CRYGC
P07316	CRYGB
P07320	CRYGD
P07327	ADH1A
P07333	CSF1R
P07355	ANXA2
P07437	TUBB
P07438	MT1B
P07476	IVL
P07550	ADRB2
P07711	CTSL
P07737	PFN1
P07741	APRT
P07864	LDHC
P07900	HSP90AA1
P07910	HNRNPC
P07948	LYN
P07954	FH
P07992	ERCC1
P08047	SP1
P08048	ZFY
P08069	IGF1R
P08118	MSMB
P08134	RHOC
P08138	NGFR
P08151	GLI1
P08183	ABCB1
P08195	SLC3A2
P08235	NR3C2
P08237	PFKM
P08238	HSP90AB1
P08253	MMP2
P08294	SOD3
P08311	CTSG
P08319	ADH4
P08559	PDHA1
P08574	CYC1
P08579	SNRPB2
P08621	SNRNP70
P08631	HCK
P08651	NFIC
P08670	VIM
P08708	RPS17
P08729	KRT7
P08779	KRT16
P08865	RPSA
P08962	CD63
P08F94	PKHD1
P09012	SNRPA
P09016	HOXD4
P09017	HOXC4
P09038	FGF2
P09067	HOXB5
P09086	POU2F2
P09132	SRP19
P09211	GSTP1
P09234	SNRPC
P09429	HMGB1
P09430	TNP1
P09455	RBP1
P09467	FBP1
P09486	SPARC
P09525	ANXA4
P09601	HMOX1
P09603	CSF1
P09619	PDGFRB
P09622	DLD
P09629	HOXB7
P09630	HOXC6
P09651	HNRNPA1
P09661	SNRPA1
P09758	TACSTD2
P09874	PARP1
P09884	POLA1
P09917	ALOX5
P09936	UCHL1
P09960	LTA4H
P0C0S5	H2AZ1
P0C0S8	H2AC11
P0C1H6	H2BW2
P0C1S8	WEE2
P0C1Z6	TFPT
P0C5Y9	H2AB1
P0C5Z0	H2AB2
P0C6A0	ZGLP1
P0C7H9	USP17L7
P0C7I0	USP17L8
P0C7M4	RHOXF2B
P0C7P1	RBMY1D
P0C7P3	SLFN14
P0C7T5	ATXN1L
P0C7V6	SUPT20HL2
P0C7X2	ZNF688
P0C7X5	ZNF806
P0C860	MSL3P1
P0C870	JMJD7
P0CAP2	POLR2M
P0CB33	ZNF735
P0CB38	PABPC4L
P0CB47	UBTFL1
P0CB48	UBTFL6
P0CE71	OCM2
P0CE72	OCM
P0CG00	ZSCAN5DP
P0CG12	DERPC
P0CG13	CHTF8
P0CG24	ZNF883
P0CG30	GSTT2B
P0CG31	ZNF286B
P0CG32	ZCCHC18
P0CG40	SP9
P0CG47	UBB
P0CG48	UBC
P0CH99	ZNF705D
P0CI00	ZNF705B
P0CJ78	ZNF865
P0CJ79	ZNF888
P0CJ85	DUX4L2
P0CJ86	DUX4L3
P0CJ87	DUX4L4
P0CJ88	DUX4L5
P0CJ89	DUX4L6
P0CJ90	DUX4L7
P0CL83	STAG3L1
P0CL84	STAG3L2
P0CL85	STAG3L3
P0CV98	TSPY3
P0CV99	TSPY4
P0CW00	TSPY8
P0CW01	TSPY10
P0DI81	TRAPPC2
P0DI82	TRAPPC2B
P0DJD0	RGPD1
P0DJD1	RGPD2
P0DJD3	RBMY1A1
P0DJD4	RBMY1C
P0DKX0	ZNF728
P0DM35	MT1HL1
P0DM63	NPIPA8
P0DME0	SETSIP
P0DMR1	HNRNPCL4
P0DMU7	CT45A6
P0DMU8	CT45A5
P0DMU9	CT45A10
P0DMV0	CT45A7
P0DMV1	CT45A8
P0DMV2	CT45A9
P0DMV8	HSPA1A
P0DMV9	HSPA1B
P0DMW2	NLRP2B
P0DP23	CALM1
P0DP24	CALM2
P0DP25	CALM3
P0DPB6	POLR1D
P0DPD5	ZNF723
P0DPH7	TUBA3C
P0DPK2	H3Y1
P0DPK5	H3Y2
P10070	GLI2
P10071	GLI3
P10072	ZNF875
P10073	ZSCAN22
P10074	ZBTB48
P10075	GLI4
P10144	GZMB
P10155	RO60
P10242	MYB
P10243	MYBL1
P10244	MYBL2
P10275	AR
P10276	RARA
P10323	ACR
P10412	H1-4
P10415	BCL2
P10588	NR2F6
P10589	NR2F1
P10599	TXN
P10600	TGFB3
P10636	MAPT
P10721	KIT
P10826	RARB
P10827	THRA
P10828	THRB
P10909	CLU
P10912	GHR
P10914	IRF1
P11021	HSPA5
P11142	HSPA8
P11161	EGR2
P11166	SLC2A1
P11171	EPB41
P11172	UMPS
P11177	PDHB
P11308	ERG
P11309	PIM1
P11310	ACADM
P11362	FGFR1
P11387	TOP1
P11388	TOP2A
P11413	G6PD
P11441	UBL4A
P11473	VDR
P11474	ESRRA
P11684	SCGB1A1
P11717	IGF2R
P11801	PSKH1
P11802	CDK4
P11831	SRF
P11836	MS4A1
P11940	PABPC1
P12004	PCNA
P12104	FABP2
P12236	SLC25A6
P12268	IMPDH2
P12270	TPR
P12271	RLBP1
P12272	PTHLH
P12273	PIP
P12277	CKB
P12524	MYCL
P12525	MYCLP1
P12544	GZMA
P12755	SKI
P12757	SKIL
P12814	ACTN1
P12931	SRC
P12956	XRCC6
P12980	LYL1
P13010	XRCC5
P13051	UNG
P13056	NR2C1
P13073	COX4I1
P13196	ALAS1
P13349	MYF5
P13378	HOXD8
P13489	RNH1
P13498	CYBA
P13569	CFTR
P13631	RARG
P13639	EEF2
P13640	MT1G
P13645	KRT10
P13646	KRT13
P13647	KRT5
P13682	ZNF35
P13693	TPT1
P13716	ALAD
P13798	APEH
P13984	GTF2F2
P13994	YJU2B
P14060	HSD3B1
P14174	MIF
P14316	IRF2
P14317	HCLS1
P14324	FDPS
P14373	TRIM27
P14618	PKM
P14625	HSP90B1
P14635	CCNB1
P14651	HOXB3
P14652	HOXB2
P14653	HOXB1
P14678	SNRPB
P14679	TYR
P14735	IDE
P14859	POU2F1
P14866	HNRNPL
P14921	ETS1
P14923	JUP
P15036	ETS2
P15056	BRAF
P15090	FABP4
P15104	GLUL
P15121	AKR1B1
P15153	RAC2
P15172	MYOD1
P15173	MYOG
P15259	PGAM2
P15309	ACP3
P15311	EZR
P15328	FOLR1
P15336	ATF2
P15374	UCHL3
P15407	FOSL1
P15408	FOSL2
P15428	HPGD
P15514	AREG
P15531	NME1
P15621	ZNF44
P15622	ZNF250
P15822	HIVEP1
P15863	PAX1
P15880	RPS2
P15884	TCF4
P15918	RAG1
P15923	TCF3
P15924	DSP
P15927	RPA2
P15941	MUC1
P15976	GATA1
P16083	NQO2
P16104	H2AX
P16144	ITGB4
P16150	SPN
P16219	ACADS
P16220	CREB1
P16234	PDGFRA
P16298	PPP3CB
P16333	NCK1
P16383	GCFC2
P16401	H1-5
P16402	H1-3
P16403	H1-2
P16415	ZNF823
P16444	DPEP1
P16455	MGMT
P16519	PCSK2
P16591	FER
P16860	NPPB
P16871	IL7R
P16989	YBX3
P17010	ZFX
P17014	ZNF12
P17017	ZNF14
P17019	ZNF708
P17020	ZNF16
P17021	ZNF17
P17022	ZNF18
P17023	ZNF19
P17024	ZNF20
P17025	ZNF182
P17026	ZNF22
P17027	ZNF23
P17028	ZNF24
P17029	ZKSCAN1
P17030	ZNF25
P17031	ZNF26
P17032	ZNF37A
P17035	ZNF28
P17036	ZNF3
P17038	ZNF43
P17039	ZNF30
P17040	ZSCAN20
P17041	ZNF32
P17066	HSPA6
P17096	HMGA1
P17097	ZNF7
P17098	ZNF8
P17174	GOT1
P17252	PRKCA
P17275	JUNB
P17301	ITGA2
P17302	GJA1
P17480	UBTF
P17481	HOXB8
P17482	HOXB9
P17483	HOXB4
P17509	HOXB6
P17535	JUND
P17542	TAL1
P17544	ATF7
P17600	SYN1
P17612	PRKACA
P17655	CAPN2
P17661	DES
P17676	CEBPB
P17706	PTPN2
P17813	ENG
P17844	DDX5
P17861	XBP1
P17931	LGALS3
P17936	IGFBP3
P17947	SPI1
P17980	PSMC3
P18074	ERCC2
P18124	RPL7
P18146	EGR1
P18505	GABRB1
P18564	ITGB6
P18583	SON
P18615	NELFE
P18621	RPL17
P18754	RCC1
P18846	ATF1
P18847	ATF3
P18848	ATF4
P18850	ATF6
P18858	LIG1
P18887	XRCC1
P19012	KRT15
P19013	KRT4
P19086	GNAZ
P19174	PLCG1
P19235	EPOR
P19338	NCL
P19387	POLR2C
P19388	POLR2E
P19404	NDUFV2
P19419	ELK1
P19447	ERCC3
P19474	TRIM21
P19484	TFEB
P19525	EIF2AK2
P19532	TFE3
P19544	WT1
P19622	EN2
P19634	SLC9A1
P19784	CSNK2A2
P19793	RXRA
P19838	NFKB1
P19883	FST
P20020	ATP2B1
P20042	EIF2S2
P20073	ANXA7
P20138	CD33
P20226	TBP
P20248	CCNA2
P20264	POU3F3
P20265	POU3F2
P20290	BTF3
P20292	ALOX5AP
P20333	TNFRSF1B
P20339	RAB5A
P20382	PMCH
P20393	NR1D1
P20396	TRH
P20472	PVALB
P20585	MSH3
P20591	MX1
P20592	MX2
P20618	PSMB1
P20671	H2AC7
P20700	LMNB1
P20719	HOXA5
P20749	BCL3
P20794	MAK
P20807	CAPN3
P20823	HNF1A
P20839	IMPDH1
P20930	FLG
P20941	PDC
P20962	PTMS
P21127	CDK11B
P21266	GSTM3
P21291	CSRP1
P21333	FLNA
P21359	NF1
P21439	ABCB4
P21453	S1PR1
P21506	ZNF10
P21580	TNFAIP3
P21589	NT5E
P21675	TAF1
P21728	DRD1
P21731	TBXA2R
P21796	VDAC1
P21802	FGFR2
P21912	SDHB
P21953	BCKDHB
P21980	TGM2
P22059	OSBP
P22087	FBL
P22090	RPS4Y1
P22303	ACHE
P22307	SCP2
P22314	UBA1
P22392	NME2
P22415	USF1
P22492	H1-6
P22607	FGFR3
P22612	PRKACG
P22626	HNRNPA2B1
P22670	RFX1
P22674	CCNO
P22676	CALB2
P22694	PRKACB
P22695	UQCRC2
P22736	NR4A1
P23025	XPA
P23193	TCEA1
P23246	SFPQ
P23258	TUBG1
P23276	KEL
P23284	PPIB
P23297	S100A1
P23378	GLDC
P23381	WARS1
P23396	RPS3
P23409	MYF6
P23443	RPS6KB1
P23458	JAK1
P23469	PTPRE
P23490	LORICRIN
P23497	SP100
P23508	MCC
P23511	NFYA
P23527	H2BC17
P23528	CFL1
P23560	BDNF
P23610	F8A1
P23677	ITPKA
P23759	PAX7
P23760	PAX3
P23769	GATA2
P23771	GATA3
P23786	CPT2
P23919	DTYMK
P24278	ZBTB25
P24385	CCND1
P24386	CHM
P24387	CRHBP
P24394	IL4R
P24468	NR2F2
P24522	GADD45A
P24530	EDNRB
P24534	EEF1B2
P24539	ATP5PB
P24855	DNASE1
P24863	CCNC
P24864	CCNE1
P24928	POLR2A
P24941	CDK2
P25025	CXCR2
P25054	APC
P25106	ACKR3
P25205	MCM3
P25208	NFYB
P25311	AZGP1
P25398	RPS12
P25440	BRD2
P25445	FAS
P25490	YY1
P25685	DNAJB1
P25686	DNAJB2
P25713	MT3
P25786	PSMA1
P25787	PSMA2
P25788	PSMA3
P25789	PSMA4
P25791	LMO2
P25800	LMO1
P25815	S100P
P25963	NFKBIA
P26038	MSN
P26196	DDX6
P26232	CTNNA2
P26358	DNMT1
P26367	PAX6
P26368	U2AF2
P26373	RPL13
P26374	CHML
P26378	ELAVL4
P26439	HSD3B2
P26447	S100A4
P26583	HMGB2
P26599	PTBP1
P26641	EEF1G
P26651	ZFP36
P27216	ANXA13
P27361	MAPK3
P27540	ARNT
P27635	RPL10
P27694	RPA1
P27695	APEX1
P27707	DCK
P27708	CAD
P27797	CALR
P27815	PDE4A
P27986	PIK3R1
P27987	ITPKB
P28062	PSMB8
P28065	PSMB9
P28066	PSMA5
P28069	POU1F1
P28070	PSMB4
P28072	PSMB6
P28074	PSMB5
P28290	ITPRID2
P28300	LOX
P28324	ELK4
P28328	PEX2
P28329	CHAT
P28340	POLD1
P28347	TEAD1
P28356	HOXD9
P28358	HOXD10
P28360	MSX1
P28370	SMARCA1
P28482	MAPK1
P28562	DUSP1
P28698	MZF1
P28702	RXRB
P28715	ERCC5
P28749	RBL1
P28838	LAP3
P28907	CD38
P29074	PTPN4
P29083	GTF2E1
P29084	GTF2E2
P29144	TPP2
P29320	EPHA3
P29323	EPHB2
P29350	PTPN6
P29371	TACR3
P29372	MPG
P29373	CRABP2
P29374	ARID4A
P29375	KDM5A
P29401	TKT
P29474	NOS3
P29475	NOS1
P29508	SERPINB3
P29558	RBMS1
P29590	PML
P29597	TYK2
P29692	EEF1D
P29728	OAS2
P29762	CRABP1
P29803	PDHA2
P29966	MARCKS
P29972	AQP1
P30041	PRDX6
P30043	BLVRB
P30044	PRDX5
P30047	GCHFR
P30050	RPL12
P30085	CMPK1
P30086	PEBP1
P30101	PDIA3
P30153	PPP2R1A
P30260	CDC27
P30279	CCND2
P30281	CCND3
P30291	WEE1
P30304	CDC25A
P30305	CDC25B
P30307	CDC25C
P30414	NKTR
P30622	CLIP1
P30626	SRI
P30793	GCH1
P30837	ALDH1B1
P30876	POLR2B
P31040	SDHA
P31146	CORO1A
P31151	S100A7
P31152	MAPK4
P31249	HOXD3
P31260	HOXA10
P31267	HOXA6
P31268	HOXA7
P31269	HOXA9
P31270	HOXA11
P31271	HOXA13
P31273	HOXC8
P31274	HOXC9
P31275	HOXC12
P31276	HOXC13
P31277	HOXD11
P31314	TLX1
P31327	CPS1
P31350	RRM2
P31483	TIA1
P31629	HIVEP2
P31644	GABRA5
P31689	DNAJA1
P31749	AKT1
P31751	AKT2
P31941	APOBEC3A
P31942	HNRNPH3
P31943	HNRNPH1
P31944	CASP14
P31947	SFN
P31948	STIP1
P31949	S100A11
P32121	ARRB2
P32242	OTX1
P32243	OTX2
P32245	MC4R
P32314	FOXN2
P32418	SLC8A1
P32456	GBP2
P32519	ELF1
P32780	GTF2H1
P32969	RPL9
P33076	CIITA
P33151	CDH5
P33240	CSTF2
P33316	DUT
P33763	S100A5
P33778	H2BC3
P33981	TTK
P33991	MCM4
P33992	MCM5
P33993	MCM7
P34896	SHMT1
P34897	SHMT2
P34925	RYK
P34931	HSPA1L
P34932	HSPA4
P34947	GRK5
P35052	GPC1
P35222	CTNNB1
P35226	BMI1
P35227	PCGF2
P35228	NOS2
P35232	PHB
P35236	PTPN7
P35237	SERPINB6
P35240	NF2
P35244	RPA3
P35249	RFC4
P35250	RFC2
P35251	RFC1
P35268	RPL22
P35269	GTF2F1
P35270	SPR
P35326	SPRR2A
P35348	ADRA1A
P35354	PTGS2
P35368	ADRA1B
P35398	RORA
P35410	MAS1L
P35452	HOXD12
P35453	HOXD13
P35498	SCN1A
P35520	CBS
P35527	KRT9
P35548	MSX2
P35557	GCK
P35568	IRS1
P35573	AGL
P35579	MYH9
P35580	MYH10
P35611	ADD1
P35625	TIMP3
P35637	FUS
P35638	DDIT3
P35658	NUP214
P35659	DEK
P35663	CYLC1
P35680	HNF1B
P35711	SOX5
P35712	SOX6
P35713	SOX18
P35716	SOX11
P35754	GLRX
P35789	ZNF93
P35813	PPM1A
P35869	AHR
P35908	KRT2
P35916	FLT4
P35968	KDR
P35998	PSMC2
P36402	TCF7
P36404	ARL2
P36405	ARL3
P36406	TRIM23
P36507	MAP2K2
P36508	ZNF76
P36578	RPL4
P36639	NUDT1
P36776	LONP1
P36873	PPP1CC
P36888	FLT3
P36897	TGFBR1
P36915	GNL1
P36954	POLR2I
P36956	SREBF1
P36957	DLST
P36969	GPX4
P37108	SRP14
P37198	NUP62
P37231	PPARG
P37275	ZEB1
P37837	TALDO1
P37840	SNCA
P38159	RBMX
P38398	BRCA1
P38432	COIL
P38571	LIPA
P38606	ATP6V1A
P38646	HSPA9
P38919	EIF4A3
P38935	IGHMBP2
P38936	CDKN1A
P39019	RPS19
P39023	RPL3
P39687	ANP32A
P39748	FEN1
P39880	CUX1
P39900	MMP12
P40121	CAPG
P40205	MYCNOS
P40238	MPL
P40259	CD79B
P40305	IFI27
P40306	PSMB10
P40337	VHL
P40424	PBX1
P40425	PBX2
P40426	PBX3
P40429	RPL13A
P40617	ARL4A
P40692	MLH1
P40763	STAT3
P40818	USP8
P40855	PEX19
P40926	MDH2
P40933	IL15
P40937	RFC5
P40938	RFC3
P41002	CCNF
P41091	EIF2S3
P41134	ID1
P41145	OPRK1
[truncated: 5,641 more rows]

## Sheet: AD MAGMA Nuclear list
List of 242 AD risk genes (MAGMA p<0.01) that also belonged to GO Nucleus list
Nuclear GO symbol	AD MAGMA -log10 pvalue
APOE	50
BIN1	17.4518
PICALM	17.1886
CLU	14.9751
SPI1	13.0865
PSMC3	10.3345
PTK2B	9.51694
FNBP4	9.2707
NDUFS3	8.77487
NFYA	8.50075
NUP160	8.49614
PTPMT1	8.25591
APOBEC2	7.96827
MTCH2	7.93476
OARD1	7.65928
TREML1	7.38643
CELF1	7.01145
CD2AP	6.84664
CD33	6.51436
SORL1	6.40839
ZYX	6.3514
TSBP1	5.90174
CSTF1	5.54606
NR1H3	5.24771
SUPT4H1	5.24608
KNOP1	5.18274
FAM131B	5.12483
MYCL	5.10568
SSBP4	5.0933
FERMT2	4.89364
DDB2	4.83553
UBE2L3	4.62877
FCF1	4.61867
ELL	4.58538
CRY2	4.56419
GPRC5B	4.24867
PROX2	4.18818
ZNF852	4.07083
CKAP5	4.05229
MAML1	4.00652
CLEC3B	3.9665
POLR2E	3.96063
ZNF197	3.95436
IPMK	3.9439
ZNF660	3.87247
DLST	3.86528
LTC4S	3.81936
ADAM10	3.81048
USP24	3.69984
RIMBP3C	3.69799
ZKSCAN7	3.69758
FAM193B	3.69319
ZNF35	3.68903
KPNB1	3.6591
ZNF445	3.56244
WAC	3.52863
IL15	3.51475
YLPM1	3.47496
PLEKHA1	3.46545
HNRNPA2B1	3.45764
UBE2N	3.42231
OAS2	3.40827
EXOSC7	3.40806
CD38	3.40241
CBX3	3.40109
NECAB1	3.39623
RNF43	3.38895
TP53INP1	3.38738
MTA1	3.35063
PPM1E	3.34995
USP8	3.32788
TEAD1	3.31367
LUC7L3	3.29873
INAVA	3.29706
SQSTM1	3.29445
NFE2L3	3.28974
GDF15	3.26055
PRRC2A	3.24485
CEP57	3.23977
FKTN	3.227
ZKSCAN1	3.21761
SNX15	3.21661
PAX4	3.19814
KANSL1L	3.17576
OAS3	3.16211
FAM76B	3.14958
BAG6	3.12507
ATF6B	3.12359
AIF1	3.11879
UBE3D	3.10339
AURKA	3.05652
ZNF502	3.05307
TRIB3	3.03047
CSNK2B	3.01848
ACTB	2.99448
SAC3D1	2.9943
CHID1	2.98945
NPEPPS	2.95794
STYX	2.92416
MAPK8IP1	2.918
OAS1	2.91034
PDCD4	2.90156
FST	2.87916
ZNF501	2.87504
HNRNPA1L2	2.86931
ZCWPW1	2.83514
MEPCE	2.80513
AMBRA1	2.79261
AGER	2.77773
INTS2	2.76604
ZSCAN21	2.76088
CSNK1G1	2.75301
STAG3	2.74528
SMOX	2.73403
RTN4	2.72533
TRIM5	2.71847
NUP88	2.71124
ARL2	2.70382
ZNF655	2.69882
MBLAC1	2.69334
CENPC	2.68388
CDCA5	2.67199
ANAPC10	2.67095
PSMC6	2.662
NME8	2.65551
NVL	2.62498
TSC22D4	2.61388
SHOC2	2.60949
KLF7	2.60614
PBX2	2.60005
CIITA	2.59929
ZFP64	2.59791
GTF3C5	2.59496
DNTT	2.59042
PURA	2.59013
THRA	2.58122
ZNF800	2.55893
KRT16	2.55318
BMS1	2.55134
SND1	2.55083
ZFPL1	2.53015
MCM7	2.51466
RFX4	2.50037
WWP2	2.49705
ZNF3	2.48816
CKB	2.4879
ZNF521	2.47644
MED13	2.46573
TAF6	2.46348
FOXO3	2.45875
KRT14	2.45521
MTMR2	2.44395
PLK3	2.44377
TRIM35	2.44285
GABPB1	2.44196
CHD4	2.43095
TRPS1	2.42733
ZBTB41	2.42397
ITGB3	2.42275
MEF2C	2.41685
NOTCH4	2.4162
TBPL2	2.40606
TC2N	2.40137
FAM220A	2.4002
PRKRA	2.39647
OTULINL	2.39569
ZNF384	2.38426
NDUFAF6	2.3833
ARPC1A	2.37571
HOXD4	2.37394
MAFK	2.37355
ZNF595	2.35224
C7orf61	2.3445
DMTF1	2.33611
MTDH	2.32918
MBD4	2.3127
ING4	2.30542
NOP2	2.29474
TSR1	2.27134
PRKD3	2.26978
TRIOBP	2.25927
VPS51	2.24365
RPAIN	2.24341
TRMT61A	2.24069
DDX41	2.23809
H2BC10	2.23724
ZPR1	2.22789
ACRBP	2.22708
CASP9	2.22645
ASPM	2.22406
YTHDC2	2.22351
SLC25A11	2.22197
COPS6	2.21869
PRKD2	2.21284
CAMK4	2.21248
AGFG1	2.21165
DTNB	2.19776
ABHD16B	2.19002
RCOR2	2.18491
GCAT	2.18015
UROD	2.17115
SPATA7	2.16471
ZNF19	2.16302
HOXD3	2.1622
UAP1	2.15815
ZNF596	2.14794
HOXD8	2.1476
BUD31	2.13963
SALL1	2.13842
CEBPZ	2.12977
METTL14	2.12705
RERE	2.12589
ZBTB1	2.12147
RBBP4	2.11831
KRT9	2.11639
PIAS1	2.1153
ZBTB12	2.11485
HFM1	2.11474
PIP4K2A	2.11438
MARK2	2.11055
TPT1	2.10125
ARID3A	2.09253
NUDT4	2.09063
SPATA2	2.08056
PPIB	2.07744
MARCHF7	2.07326
TM7SF2	2.06909
SLX4	2.06124
ETF1	2.06067
C1QBP	2.05689
FBXO25	2.05579
CLP1	2.05434
ZFP36L2	2.04982
EGR1	2.04664
NEDD4L	2.04132
PKP4	2.0367
IFFO1	2.03229
TAF6L	2.02936
PHLPP2	2.02511
POLR3D	2.01646
ALDOA	2.01491
CDK6	2.00331
